# Supplementary material for: Novel 3,5-bis(arylidiene)-4-piperidone based monocarbonyl analogs of curcumin: anticancer activity evaluation and mode of action study
Source: Royal Society of Chemistry journal article supplement (doi:10.1039/c3md00399j), 2014-01-01

## **(Supplementary Information)**

# **Novel 3,5-bis(arylidene)-4-piperidone based monocarbonyl analogues of curcumin: Anticancer activity evaluation and mode of action study**

**Anuj Thakur,<sup>a</sup> Sunny Manohar,<sup>a</sup> Christian E. Vélez Gerena,<sup>b</sup> Beatriz Zayas,<sup>b</sup>  
Vineet Kumar,<sup>c</sup> Sanjay V. Malhotra<sup>\*c</sup> and Diwan S. Rawat<sup>\*a</sup>**

### **Contents**

|           |                                                                        |                       |
|-----------|------------------------------------------------------------------------|-----------------------|
| <b>1.</b> | <b>NCI-60 one dose data of compound 10</b>                             | <b>Page no.2</b>      |
| <b>2.</b> | <b>NCI-60 five dose data of compound 10</b>                            | <b>Page no. 3-5</b>   |
| <b>3.</b> | <b>NCI-60 one dose data of compound 14</b>                             | <b>Page no. 6</b>     |
| <b>4.</b> | <b>NCI-60 one dose data of compound 22</b>                             | <b>Page no. 7</b>     |
| <b>5.</b> | <b>NCI-60 five dose data of compound 22</b>                            | <b>Page no. 8-10</b>  |
| <b>6.</b> | <b>NCI-60 one dose data of compound 23</b>                             | <b>Page no. 11</b>    |
| <b>7.</b> | <b>NMR spectra (<sup>1</sup>H, <sup>13</sup>C) of compounds (8-25)</b> | <b>Page no. 12-25</b> |

## One dose data of Compound 10

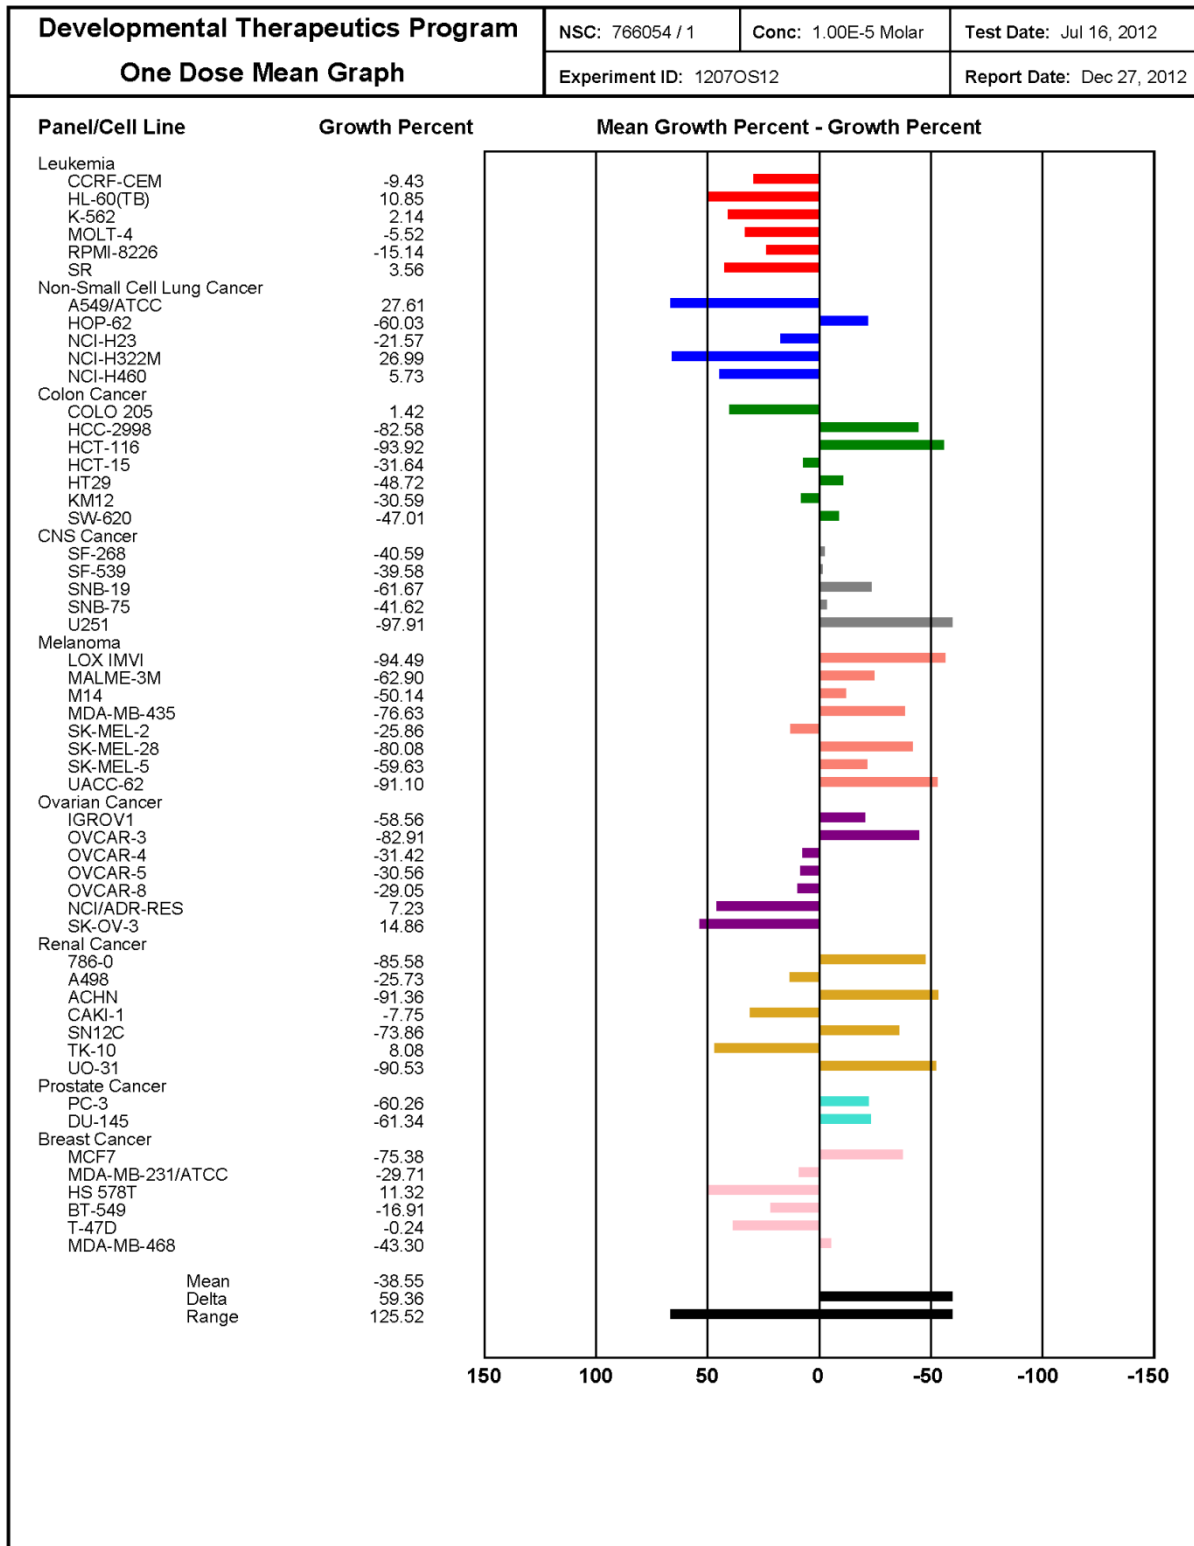

## Five dose data of Compound 10

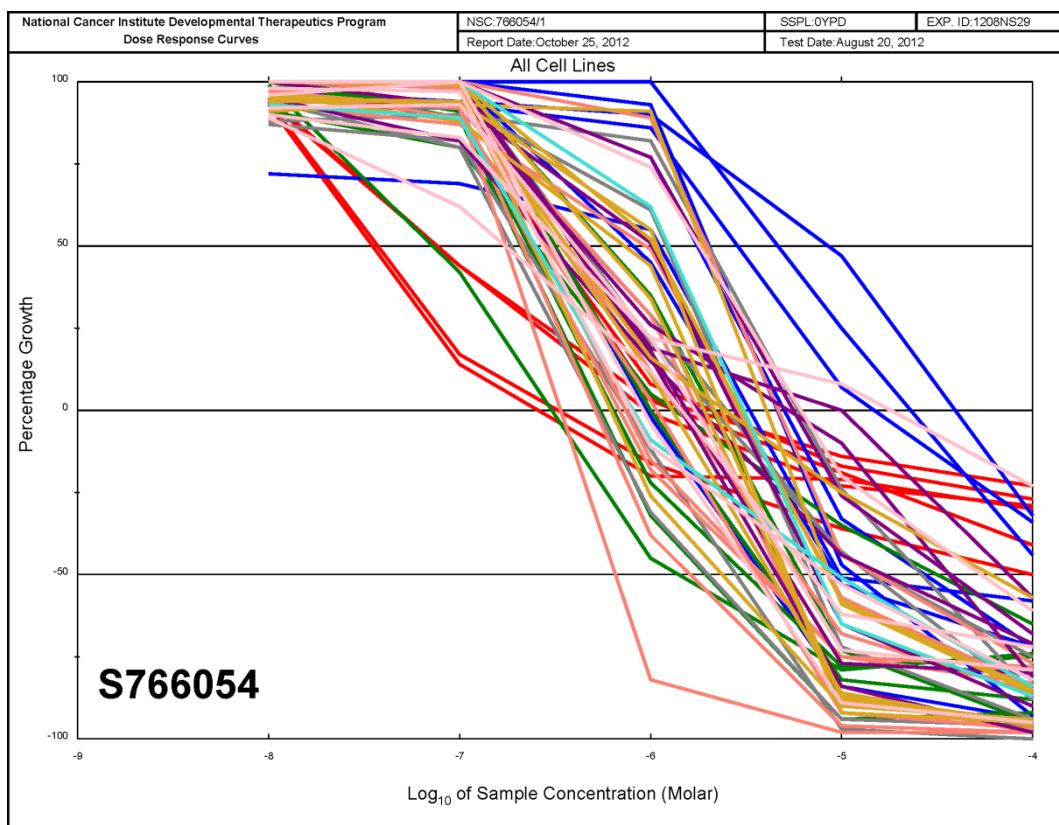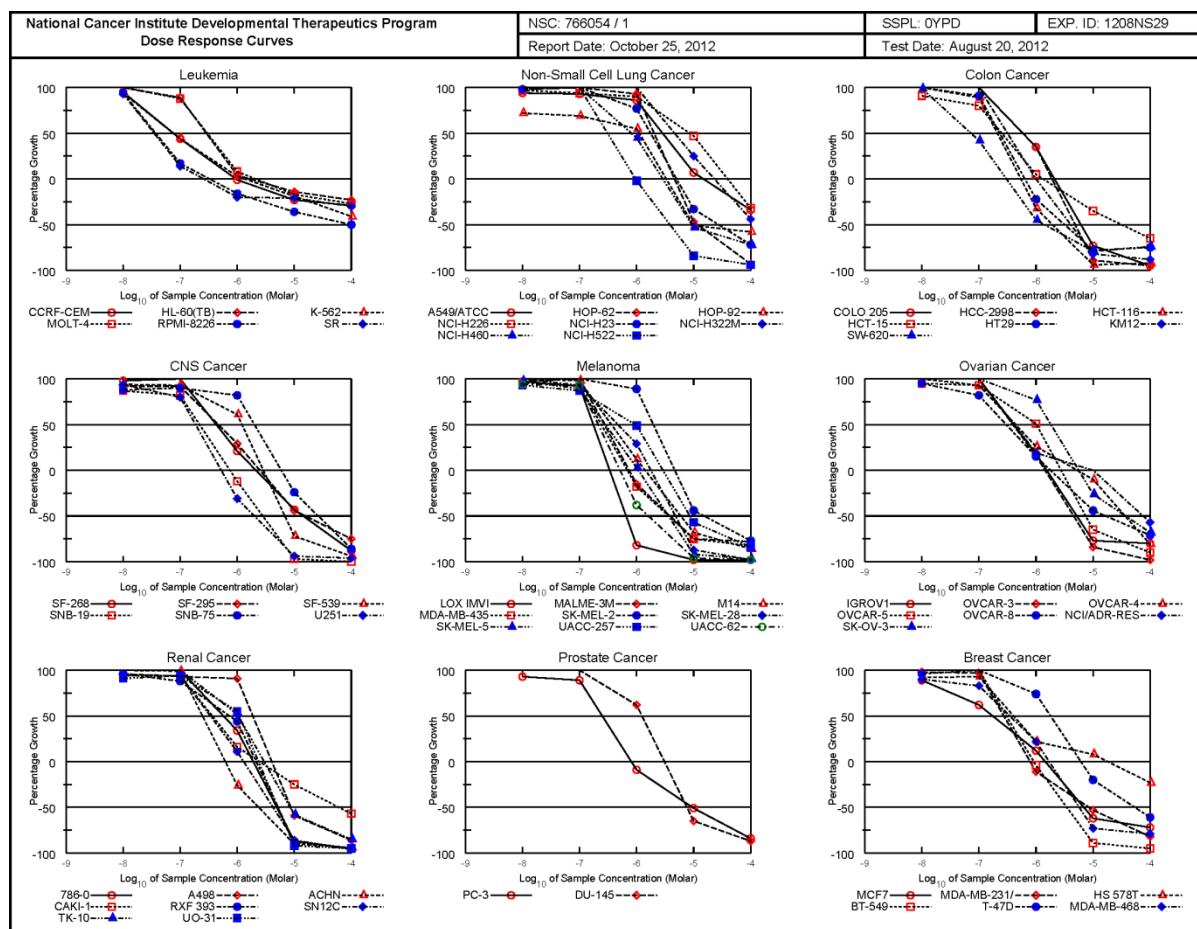

# National Cancer Institute Developmental Therapeutics Program In-Vitro Testing Results

| NSC : 766054 / 1               |           |       | Experiment ID : 1208NS29              |       |       |       |       |      |      |      |      |      | Test Type : 08 |         | Units : Molar |  |
|--------------------------------|-----------|-------|---------------------------------------|-------|-------|-------|-------|------|------|------|------|------|----------------|---------|---------------|--|
| Report Date : October 25, 2012 |           |       | Test Date : August 20, 2012           |       |       |       |       |      |      |      |      |      | QNS :          |         | MC :          |  |
| COMI : ATH 57 (119143)         |           |       | Stain Reagent : SRB Dual-Pass Related |       |       |       |       |      |      |      |      |      | SSPL : 0YPD    |         |               |  |
| Log10 Concentration            |           |       |                                       |       |       |       |       |      |      |      |      |      |                |         |               |  |
| Panel/Cell Line                | Time Zero | Ctrl  | -8.0                                  | -7.0  | -6.0  | -5.0  | -4.0  | -8.0 | -7.0 | -6.0 | -5.0 | -4.0 | GI50           | TGI     | LC50          |  |
| Leukemia                       |           |       |                                       |       |       |       |       |      |      |      |      |      |                |         |               |  |
| CCRF-CEM                       | 0.413     | 2.207 | 2.114                                 | 1.194 | 0.409 | 0.320 | 0.295 | 95   | 44   | -1   | -23  | -29  | 7.48E-8        | 9.51E-7 | > 1.00E-4     |  |
| HL-60(TB)                      | 0.726     | 2.271 | 2.524                                 | 2.102 | 0.794 | 0.627 | 0.562 | 116  | 89   | 4    | -14  | -23  | 2.89E-7        | 1.74E-6 | > 1.00E-4     |  |
| K-562                          | 0.223     | 1.728 | 1.636                                 | 0.892 | 0.268 | 0.181 | 0.132 | 94   | 44   | 3    | -19  | -41  | 7.72E-8        | 1.37E-6 | > 1.00E-4     |  |
| MOLT-4                         | 0.825     | 2.840 | 2.837                                 | 2.600 | 0.986 | 0.687 | 0.601 | 100  | 88   | 8    | -17  | -27  | 2.99E-7        | 2.11E-6 | > 1.00E-4     |  |
| RPMI-8226                      | 0.766     | 2.582 | 2.464                                 | 1.080 | 0.644 | 0.488 | 0.380 | 94   | 17   | -16  | -36  | -50  | 3.72E-8        | 3.31E-7 | 9.38E-5       |  |
| SR                             | 0.315     | 1.508 | 1.426                                 | 0.477 | 0.252 | 0.250 | 0.220 | 93   | 14   | -20  | -21  | -30  | 3.48E-8        | 2.52E-7 | > 1.00E-4     |  |
| Non-Small Cell Lung Cancer     |           |       |                                       |       |       |       |       |      |      |      |      |      |                |         |               |  |
| A549/ATCC                      | 0.517     | 2.285 | 2.184                                 | 2.170 | 2.046 | 0.635 | 0.343 | 94   | 93   | 86   | 7    | -34  | 2.86E-6        | 1.46E-5 | > 1.00E-4     |  |
| HOP-62                         | 0.438     | 1.069 | 1.055                                 | 1.131 | 1.026 | 0.234 | 0.032 | 98   | 110  | 93   | -47  | -93  | 2.04E-6        | 4.64E-6 | 1.19E-5       |  |
| HOP-92                         | 1.492     | 1.799 | 1.712                                 | 1.704 | 1.661 | 0.731 | 0.621 | 72   | 69   | 55   | -51  | -58  | 1.11E-6        | 3.30E-6 | 9.78E-6       |  |
| NCI-H226                       | 0.689     | 1.312 | 1.292                                 | 1.276 | 1.252 | 0.983 | 0.470 | 97   | 94   | 90   | 47   | -32  | 8.62E-6        | 3.96E-5 | > 1.00E-4     |  |
| NCI-H23                        | 1.221     | 3.157 | 3.127                                 | 3.155 | 2.709 | 0.816 | 0.337 | 98   | 100  | 77   | -33  | -72  | 1.75E-6        | 4.99E-6 | 2.68E-5       |  |
| NCI-H322M                      | 0.826     | 1.763 | 1.780                                 | 1.789 | 1.776 | 1.059 | 0.459 | 102  | 103  | 101  | 25   | -44  | 4.70E-6        | 2.28E-5 | > 1.00E-4     |  |
| NCI-H460                       | 0.303     | 2.702 | 2.776                                 | 2.796 | 1.387 | 0.141 | 0.085 | 103  | 104  | 45   | -53  | -72  | 8.28E-7        | 2.87E-6 | 9.22E-6       |  |
| NCI-H522                       | 1.093     | 2.526 | 2.533                                 | 2.548 | 1.074 | 0.174 | 0.063 | 100  | 102  | -2   | -84  | -94  | 3.16E-7        | 9.62E-7 | 3.85E-6       |  |
| Colon Cancer                   |           |       |                                       |       |       |       |       |      |      |      |      |      |                |         |               |  |
| COLO 205                       | 0.406     | 1.738 | 1.835                                 | 1.820 | 0.869 | 0.111 | 0.022 | 107  | 106  | 35   | -73  | -95  | 6.12E-7        | 2.11E-6 | 6.14E-6       |  |
| HCC-2998                       | 1.066     | 2.964 | 2.997                                 | 3.053 | 1.721 | 0.120 | 0.048 | 102  | 105  | 35   | -89  | -95  | 6.02E-7        | 1.91E-6 | 4.85E-6       |  |
| HCT-116                        | 0.234     | 2.531 | 2.700                                 | 2.273 | 0.159 | 0.013 | 0.018 | 107  | 89   | -32  | -94  | -92  | 2.09E-7        | 5.43E-7 | 1.94E-6       |  |
| HCT-15                         | 0.272     | 2.386 | 2.204                                 | 1.964 | 0.369 | 0.176 | 0.095 | 91   | 80   | 5    | -35  | -65  | 2.50E-7        | 1.30E-6 | 3.07E-5       |  |
| HT29                           | 0.239     | 1.435 | 1.494                                 | 1.323 | 0.187 | 0.054 | 0.060 | 105  | 91   | -22  | -78  | -75  | 2.29E-7        | 6.38E-7 | 3.19E-6       |  |
| KM12                           | 0.471     | 2.370 | 2.488                                 | 2.424 | 0.473 | 0.083 | 0.058 | 106  | 103  | .    | -82  | -88  | 3.27E-7        | 1.00E-6 | 4.04E-6       |  |
| SW-620                         | 0.321     | 2.331 | 2.309                                 | 1.164 | 0.178 | 0.069 | 0.084 | 99   | 42   | -45  | -79  | -74  | 7.21E-8        | 3.05E-7 | 1.45E-6       |  |
| CNS Cancer                     |           |       |                                       |       |       |       |       |      |      |      |      |      |                |         |               |  |
| SF-268                         | 0.646     | 1.992 | 1.963                                 | 1.990 | 0.933 | 0.369 | 0.077 | 98   | 100  | 21   | -43  | -88  | 4.31E-7        | 2.15E-6 | 1.44E-5       |  |
| SF-295                         | 0.932     | 2.800 | 2.658                                 | 2.652 | 1.476 | 0.523 | 0.234 | 92   | 92   | 29   | -44  | -75  | 4.66E-7        | 2.50E-6 | 1.57E-5       |  |
| SF-539                         | 0.922     | 2.384 | 2.302                                 | 2.287 | 1.816 | 0.256 | 0.057 | 94   | 93   | 61   | -72  | -94  | 1.21E-6        | 2.87E-6 | 6.81E-6       |  |
| SNB-19                         | 0.341     | 1.418 | 1.280                                 | 1.226 | 0.302 | 0.011 | 0.002 | 87   | 82   | -12  | -97  | -100 | 2.20E-7        | 7.52E-7 | 2.82E-6       |  |
| SNB-75                         | 0.740     | 1.612 | 1.505                                 | 1.522 | 1.452 | 0.560 | 0.106 | 88   | 90   | 82   | -24  | -86  | 1.99E-6        | 5.90E-6 | 2.62E-5       |  |
| U251                           | 0.540     | 2.190 | 2.095                                 | 1.867 | 0.375 | 0.032 | 0.022 | 94   | 80   | -31  | -94  | -96  | 1.88E-7        | 5.30E-7 | 2.02E-6       |  |
| Melanoma                       |           |       |                                       |       |       |       |       |      |      |      |      |      |                |         |               |  |
| LOX IMVI                       | 0.507     | 2.744 | 2.667                                 | 2.573 | 0.092 | 0.010 | 0.012 | 97   | 92   | -82  | -98  | -98  | 1.75E-7        | 3.39E-7 | 6.56E-7       |  |
| MALME-3M                       | 0.498     | 0.755 | 0.748                                 | 0.757 | 0.424 | 0.123 | 0.111 | 97   | 101  | -15  | -75  | -78  | 2.74E-7        | 7.42E-7 | 3.81E-6       |  |
| M14                            | 0.381     | 1.831 | 1.876                                 | 1.801 | 0.549 | 0.121 | 0.052 | 103  | 98   | 12   | -68  | -86  | 3.59E-7        | 1.40E-6 | 5.91E-6       |  |
| MDA-MB-435                     | 0.645     | 2.605 | 2.529                                 | 2.452 | 0.528 | 0.161 | 0.112 | 96   | 92   | -18  | -75  | -83  | 2.41E-7        | 6.85E-7 | 3.63E-6       |  |
| SK-MEL-2                       | 1.130     | 2.292 | 2.354                                 | 2.426 | 2.170 | 0.629 | 0.256 | 105  | 112  | 89   | -44  | -77  | 1.97E-6        | 4.66E-6 | 1.48E-5       |  |
| SK-MEL-28                      | 0.529     | 1.516 | 1.521                                 | 1.448 | 0.817 | 0.070 | 0.012 | 100  | 93   | 29   | -87  | -98  | 4.73E-7        | 1.79E-6 | 4.82E-6       |  |
| SK-MEL-5                       | 0.512     | 2.232 | 2.203                                 | 2.050 | 0.566 | 0.039 | 0.014 | 98   | 89   | 3    | -92  | -97  | 2.86E-7        | 1.08E-6 | 3.60E-6       |  |
| UACC-257                       | 0.859     | 1.861 | 1.792                                 | 1.728 | 1.350 | 0.370 | 0.140 | 93   | 87   | 49   | -57  | -84  | 9.39E-7        | 2.90E-6 | 8.60E-6       |  |
| UACC-62                        | 0.738     | 2.891 | 2.771                                 | 2.730 | 0.460 | 0.028 | 0.018 | 94   | 93   | -38  | -96  | -98  | 2.12E-7        | 5.14E-7 | 1.62E-6       |  |
| Ovarian Cancer                 |           |       |                                       |       |       |       |       |      |      |      |      |      |                |         |               |  |
| IGROV1                         | 0.626     | 1.786 | 1.857                                 | 1.857 | 0.839 | 0.141 | 0.128 | 106  | 106  | 18   | -77  | -80  | 4.36E-7        | 1.55E-6 | 5.17E-6       |  |
| OVCAR-3                        | 0.673     | 1.781 | 1.889                                 | 1.911 | 0.849 | 0.107 | 0.016 | 110  | 112  | 16   | -84  | -98  | 4.41E-7        | 1.44E-6 | 4.56E-6       |  |
| OVCAR-4                        | 0.743     | 1.523 | 1.520                                 | 1.468 | 0.948 | 0.667 | 0.140 | 100  | 93   | 26   | -10  | -81  | 4.41E-7        | 5.23E-6 | 3.63E-5       |  |
| OVCAR-5                        | 0.703     | 1.651 | 1.602                                 | 1.585 | 1.187 | 0.245 | 0.073 | 95   | 93   | 51   | -65  | -90  | 1.02E-6        | 2.75E-6 | 7.40E-6       |  |
| OVCAR-8                        | 0.418     | 1.883 | 1.814                                 | 1.626 | 0.634 | 0.232 | 0.123 | 95   | 82   | 15   | -44  | -71  | 3.01E-7        | 1.77E-6 | 1.63E-5       |  |
| NCI/ADR-RES                    | 0.709     | 2.413 | 2.478                                 | 2.521 | 1.026 | 0.715 | 0.308 | 104  | 106  | 19   | -    | -57  | 4.39E-7        | 1.01E-5 | 7.67E-5       |  |
| SK-OV-3                        | 0.609     | 1.479 | 1.506                                 | 1.529 | 1.282 | 0.452 | 0.194 | 103  | 106  | 77   | -26  | -68  | 1.84E-6        | 5.62E-6 | 3.72E-5       |  |
| Renal Cancer                   |           |       |                                       |       |       |       |       |      |      |      |      |      |                |         |               |  |
| 786-O                          | 0.666     | 2.484 | 2.558                                 | 2.555 | 1.281 | 0.088 | 0.033 | 104  | 104  | 34   | -87  | -95  | 5.87E-7        | 1.91E-6 | 4.95E-6       |  |
| A498                           | 1.472     | 2.379 | 2.347                                 | 2.320 | 2.296 | 0.610 | 0.209 | 96   | 93   | 91   | -59  | -86  | 1.88E-6        | 4.05E-6 | 8.76E-6       |  |
| ACHN                           | 0.359     | 1.766 | 1.782                                 | 1.745 | 0.267 | 0.036 | 0.021 | 101  | 99   | -26  | -90  | -94  | 2.46E-7        | 6.22E-7 | 2.39E-6       |  |
| CAKI-1                         | 0.844     | 2.716 | 2.597                                 | 2.605 | 1.140 | 0.633 | 0.367 | 94   | 94   | 16   | -25  | -57  | 3.65E-7        | 2.43E-6 | 6.19E-5       |  |
| RXF 393                        | 0.639     | 1.083 | 1.063                                 | 1.030 | 0.833 | 0.075 | 0.033 | 96   | 88   | 44   | -88  | -95  | 7.23E-7        | 2.14E-6 | 5.13E-6       |  |
| SN12C                          | 1.067     | 3.214 | 3.101                                 | 3.087 | 1.314 | 0.147 | 0.040 | 95   | 94   | 11   | -86  | -96  | 3.42E-7        | 1.31E-6 | 4.26E-6       |  |
| TK-10                          | 0.758     | 1.534 | 1.557                                 | 1.583 | 1.158 | 0.319 | 0.111 | 103  | 106  | 52   | -58  | -85  | 1.03E-6        | 2.96E-6 | 8.46E-6       |  |
| UO-31                          | 0.836     | 2.268 | 2.144                                 | 2.183 | 1.628 | 0.064 | 0.040 | 91   | 94   | 55   | -92  | -95  | 1.09E-6        | 2.37E-6 | 5.17E-6       |  |
| Prostate Cancer                |           |       |                                       |       |       |       |       |      |      |      |      |      |                |         |               |  |
| PC-3                           | 0.658     | 1.733 | 1.656                                 | 1.610 | 0.597 | 0.320 | 0.103 | 93   | 89   | -9   | -51  | -84  | 2.48E-7        | 8.03E-7 | 9.28E-6       |  |
| DU-145                         | 0.565     | 1.789 | 1.867                                 | 1.929 | 1.324 | 0.198 | 0.076 | 106  | 111  | 62   | -65  | -87  | 1.24E-6        | 3.08E-6 | 7.62E-6       |  |
| Breast Cancer                  |           |       |                                       |       |       |       |       |      |      |      |      |      |                |         |               |  |
| MCF7                           | 0.433     | 2.433 | 2.208                                 | 1.679 | 0.671 | 0.165 | 0.123 | 89   | 62   | 12   | -62  | -72  | 1.75E-7        | 1.45E-6 | 6.88E-6       |  |
| MDA-MB-231/ATCC                | 0.640     | 1.460 | 1.447                                 | 1.432 | 0.567 | 0.301 | 0.115 | 98   | 97   | -11  | -53  | -82  | 2.70E-7        | 7.84E-7 | 8.48E-6       |  |
| HS 578T                        | 0.925     | 2.014 | 1.926                                 | 1.936 | 1.160 | 0.107 | 0.714 | 92   | 93   | 22   | 8    | -23  | 3.99E-7        | 1.86E-5 | > 1.00E-4     |  |
| BT-549                         | 0.802     | 1.731 | 1.748                                 | 1.831 | 0.774 | 0.092 | 0.039 | 102  | 111  | -4   | -89  | -95  | 3.40E-7        | 9.31E-7 | 3.52E-6       |  |
| T-47D                          | 0.716     | 1.693 | 1.657                                 | 1.707 | 1.438 | 0.571 | 0.281 | 96   | 101  | 74   | -20  | -61  | 1.79E-6        | 6.09E-6 | 5.43E-5       |  |
| MDA-MB-468                     | 0.705     | 1.561 | 1.476                                 | 1.418 | 0.893 | 0.193 | 0.147 | 90   | 83   | 22   | -73  | -79  | 3.49E-7        | 1.71E-6 | 5.77E-6       |  |

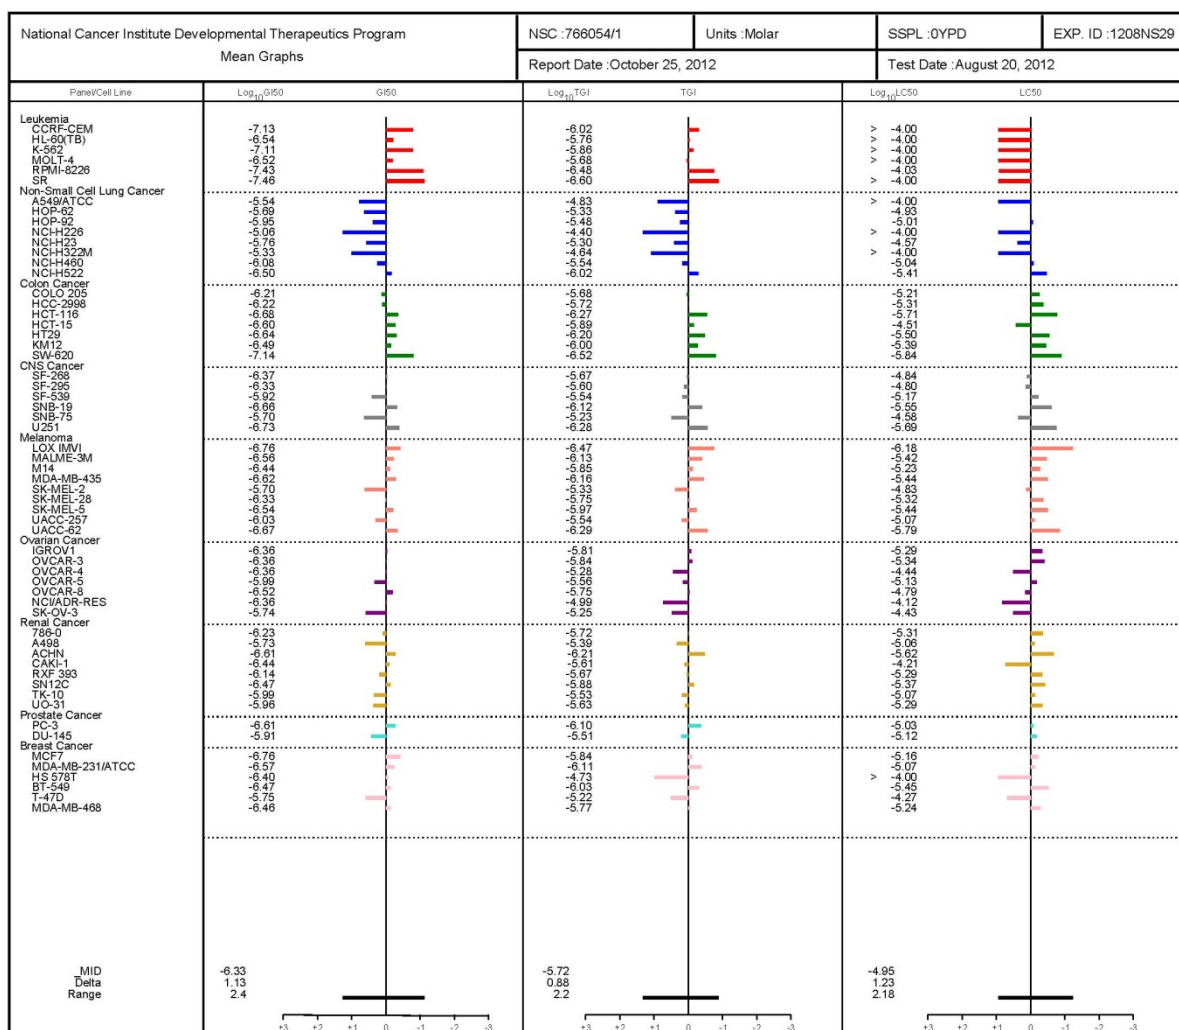

# One dose data of Compound 14

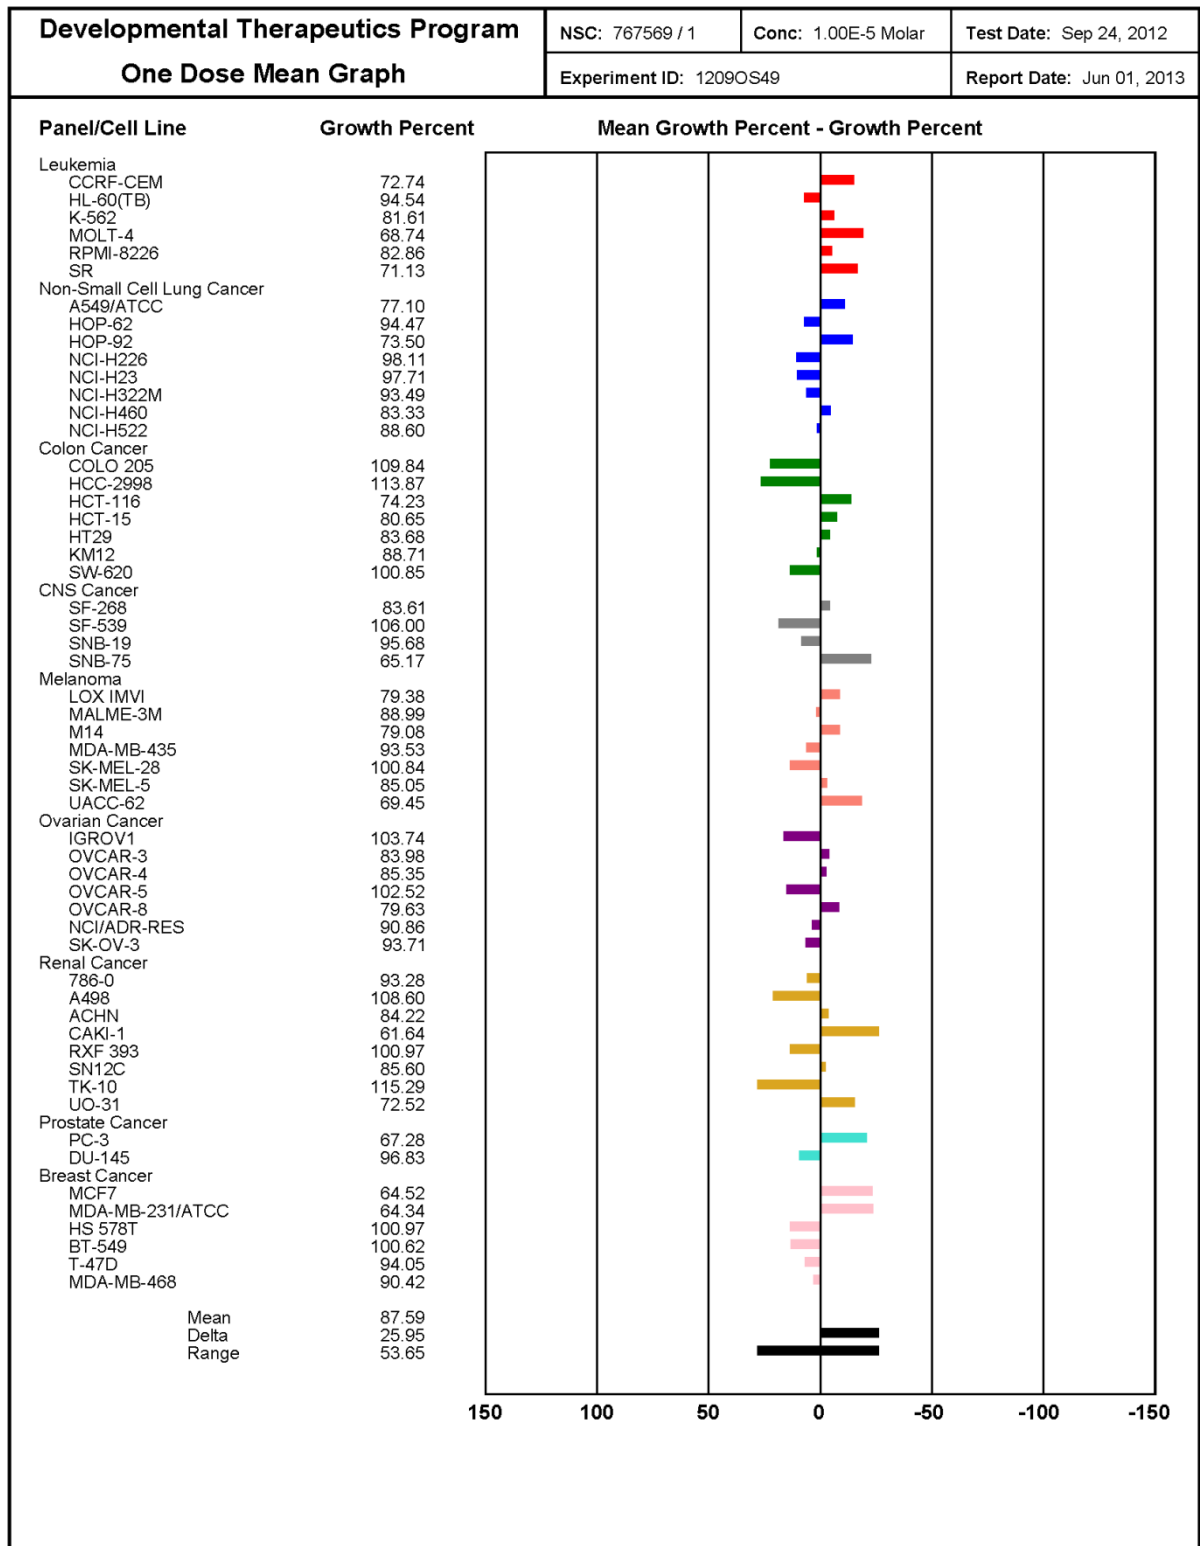

# One dose data of Compound 22

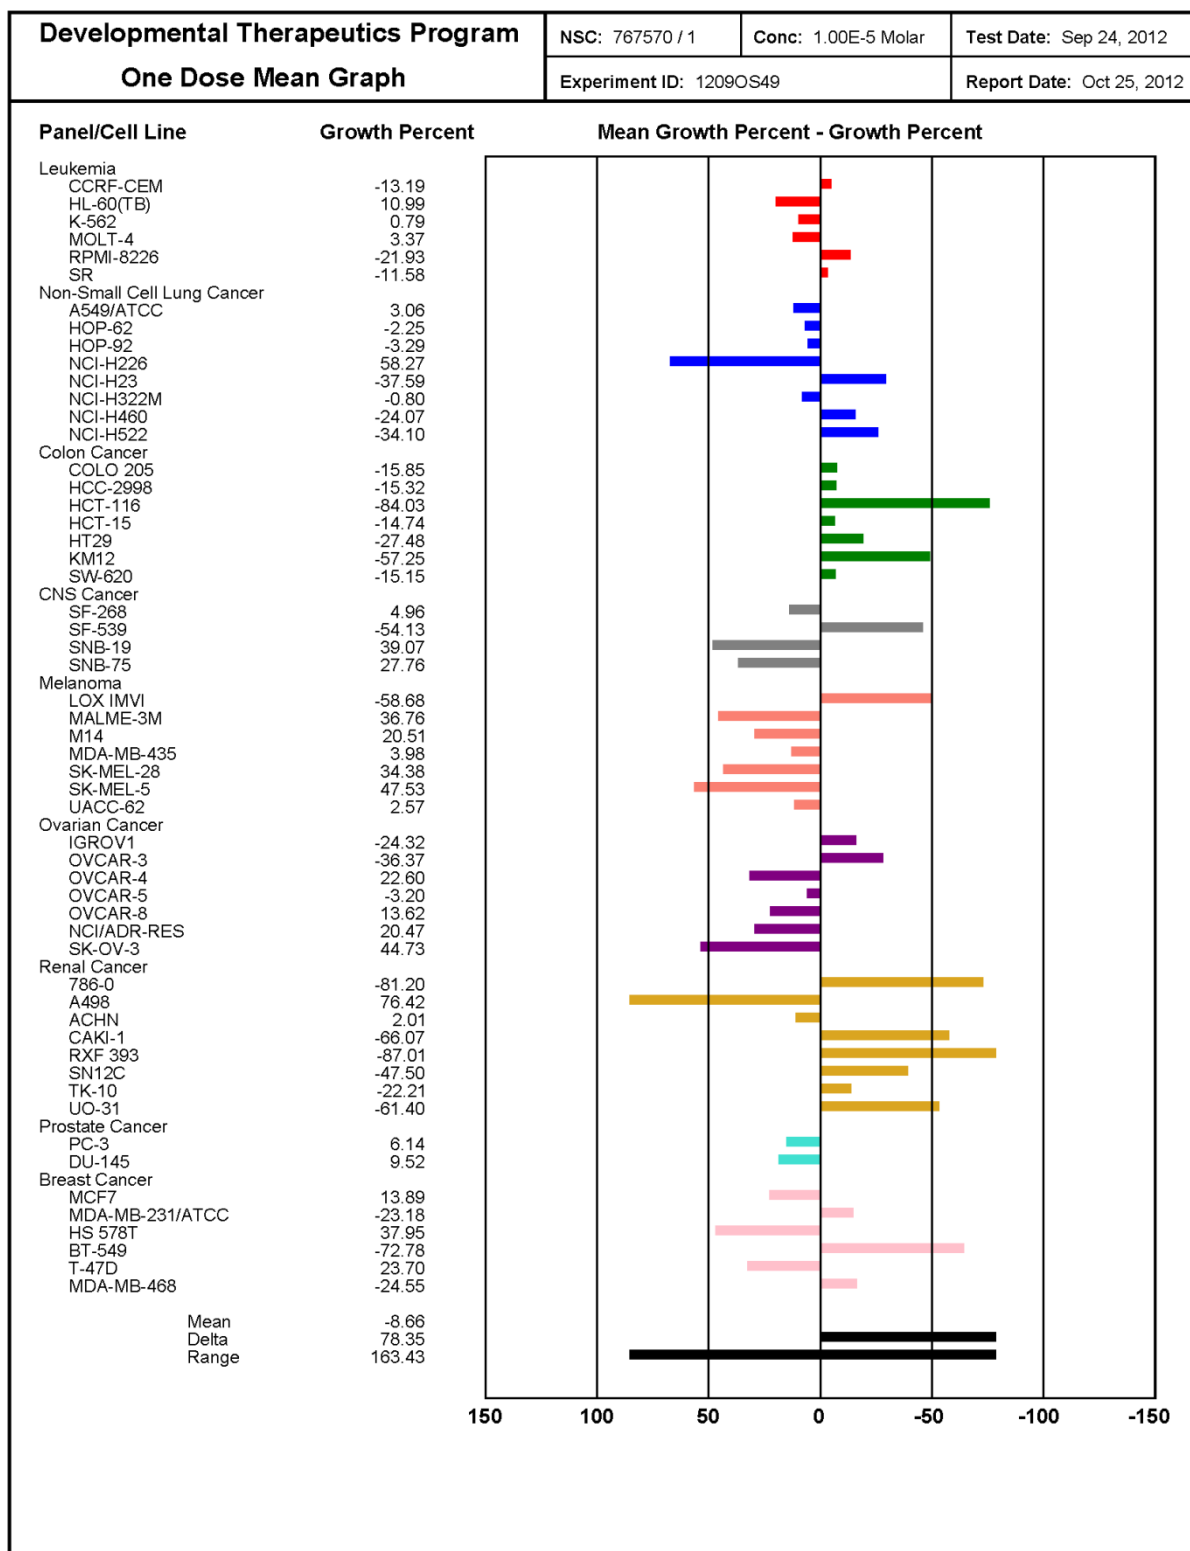

## Five dose data of Compound 22

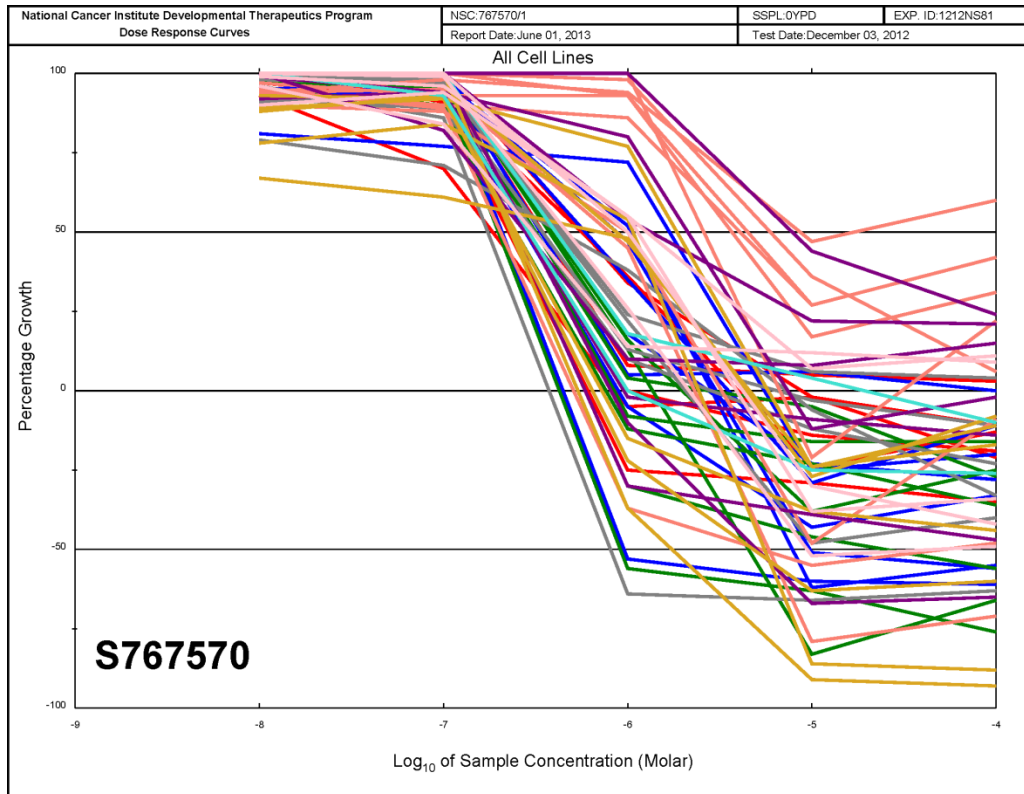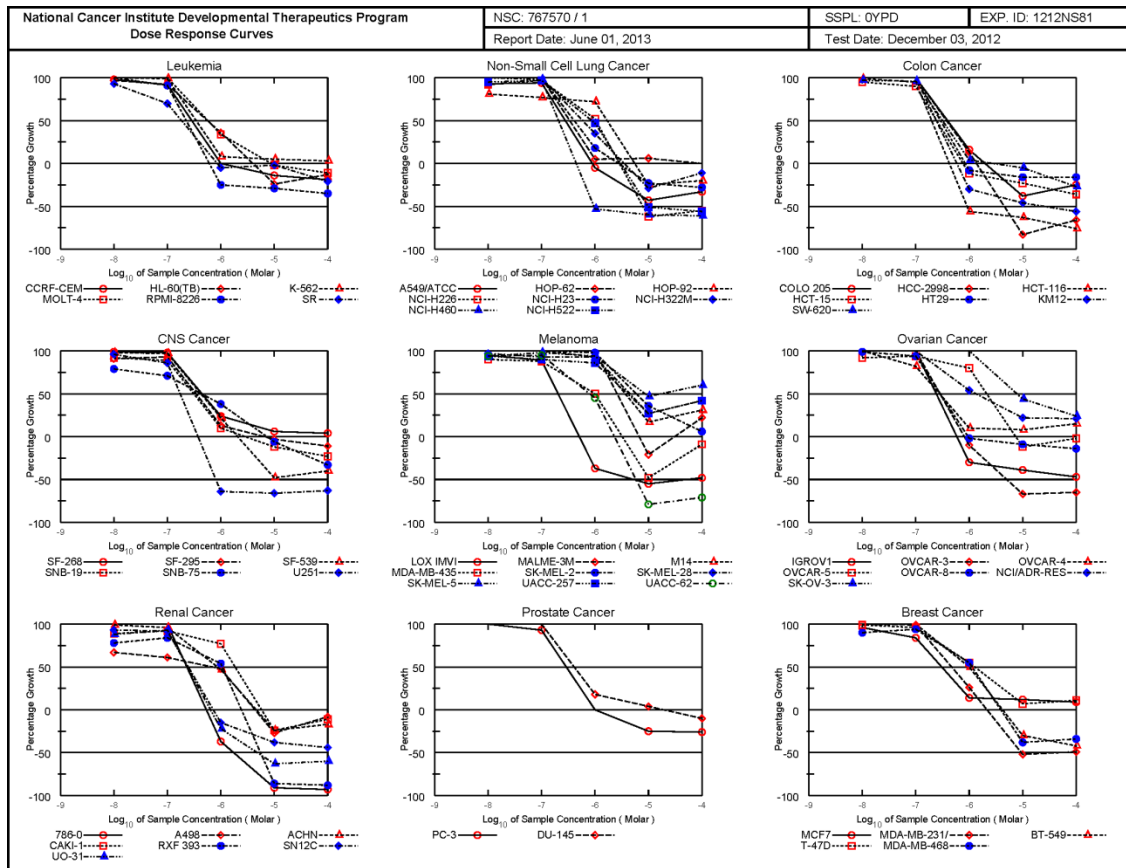



**National Cancer Institute Developmental Therapeutics Program  
In-Vitro Testing Results**

|                             |           |       |                                       |       |       |       |       |      |      |      |      |      |                |           |           |               |  |  |
|-----------------------------|-----------|-------|---------------------------------------|-------|-------|-------|-------|------|------|------|------|------|----------------|-----------|-----------|---------------|--|--|
| NSC : 767570 / 1            |           |       | Experiment ID : 1212NS81              |       |       |       |       |      |      |      |      |      | Test Type : 08 |           |           | Units : Molar |  |  |
| Report Date : June 01, 2013 |           |       | Test Date : December 03, 2012         |       |       |       |       |      |      |      |      |      | QNS :          |           |           | MC :          |  |  |
| COMI : ATH-78 (120563)      |           |       | Stain Reagent : SRB Dual-Pass Related |       |       |       |       |      |      |      |      |      | SSPL : 0YPD    |           |           |               |  |  |
| Log10 Concentration         |           |       |                                       |       |       |       |       |      |      |      |      |      |                |           |           |               |  |  |
| Panel/Cell Line             | Time Zero | Ctrl  | -8.0                                  | -7.0  | -6.0  | -5.0  | -4.0  | -8.0 | -7.0 | -6.0 | -5.0 | -4.0 | GI50           | TGI       | LC50      |               |  |  |
| Leukemia                    |           |       |                                       |       |       |       |       |      |      |      |      |      |                |           |           |               |  |  |
| CCRF-CEM                    | 0.596     | 2.110 | 2.079                                 | 1.991 | 0.595 | 0.514 | 0.485 | 98   | 92   | .    | -14  | -19  | 2.86E-7        | 9.94E-7   | > 1.00E-4 |               |  |  |
| HL-60(TB)                   | 0.628     | 2.726 | 2.666                                 | 2.560 | 1.382 | 0.477 | 0.544 | 97   | 92   | 36   | -24  | -13  | 5.62E-7        | 3.97E-6   | > 1.00E-4 |               |  |  |
| K-562                       | 0.230     | 1.978 | 2.006                                 | 1.969 | 0.364 | 0.311 | 0.282 | 102  | 99   | 8    | 5    | 3    | 3.46E-7        | > 1.00E-4 | > 1.00E-4 |               |  |  |
| MOLT-4                      | 0.620     | 2.092 | 2.148                                 | 2.176 | 1.116 | 0.611 | 0.552 | 104  | 106  | 34   | -2   | -11  | 5.94E-7        | 9.05E-6   | > 1.00E-4 |               |  |  |
| RPMI-8226                   | 1.538     | 3.079 | 3.140                                 | 2.939 | 1.147 | 1.095 | 1.002 | 104  | 91   | -25  | -29  | -35  | 2.25E-7        | 6.05E-7   | > 1.00E-4 |               |  |  |
| SR                          | 0.256     | 0.727 | 0.694                                 | 0.586 | 0.244 | 0.251 | 0.202 | 93   | 70   | -5   | -2   | -21  | 1.85E-7        | 8.65E-7   | > 1.00E-4 |               |  |  |
| Non-Small Cell Lung Cancer  |           |       |                                       |       |       |       |       |      |      |      |      |      |                |           |           |               |  |  |
| A549/ATCC                   | 0.477     | 1.955 | 1.846                                 | 1.863 | 0.453 | 0.270 | 0.320 | 93   | 94   | -5   | -43  | -33  | 2.77E-7        | 8.87E-7   | > 1.00E-4 |               |  |  |
| HOP-62                      | 0.508     | 1.146 | 1.167                                 | 1.231 | 0.541 | 0.544 | 0.511 | 103  | 113  | 5    | 6    | .    | 3.85E-7        | > 1.00E-4 | > 1.00E-4 |               |  |  |
| HOP-92                      | 1.407     | 1.960 | 1.853                                 | 1.836 | 1.807 | 1.057 | 1.126 | 81   | 77   | 72   | -25  | -20  | 1.70E-6        | 5.55E-6   | > 1.00E-4 |               |  |  |
| NCH-H226                    | 0.992     | 2.441 | 2.326                                 | 2.402 | 1.747 | 0.382 | 0.443 | 92   | 97   | 52   | -62  | -55  | 1.04E-6        | 2.87E-6   | 7.92E-6   |               |  |  |
| NCH-H23                     | 0.899     | 2.730 | 2.789                                 | 2.804 | 1.224 | 0.690 | 0.648 | 103  | 104  | 18   | -23  | -28  | 4.23E-7        | 2.71E-6   | > 1.00E-4 |               |  |  |
| NCH-H322M                   | 0.925     | 1.672 | 1.726                                 | 1.840 | 1.190 | 0.659 | 0.819 | 107  | 123  | 35   | -29  | -11  | 6.80E-7        | 3.56E-6   | > 1.00E-4 |               |  |  |
| NCH-H460                    | 0.366     | 2.833 | 2.910                                 | 2.783 | 0.173 | 0.146 | 0.143 | 103  | 98   | -53  | -60  | -61  | 2.08E-7        | 4.47E-7   | 9.59E-7   |               |  |  |
| NCH-H522                    | 0.807     | 1.501 | 1.467                                 | 1.482 | 1.130 | 0.394 | 0.352 | 95   | 97   | 47   | -51  | -56  | 8.54E-7        | 2.99E-6   | 9.73E-6   |               |  |  |
| Colon Cancer                |           |       |                                       |       |       |       |       |      |      |      |      |      |                |           |           |               |  |  |
| COLO 205                    | 0.405     | 1.613 | 1.689                                 | 1.692 | 0.603 | 0.253 | 0.305 | 106  | 107  | 16   | -38  | -25  | 4.24E-7        | 2.01E-6   | > 1.00E-4 |               |  |  |
| HCC-2998                    | 0.837     | 2.315 | 2.345                                 | 2.345 | 1.026 | 0.144 | 0.288 | 102  | 102  | 13   | -83  | -66  | 3.83E-7        | 1.36E-6   | 4.54E-6   |               |  |  |
| HCT-116                     | 0.189     | 1.785 | 1.770                                 | 1.704 | 0.083 | 0.070 | 0.045 | 99   | 95   | -56  | -63  | -76  | 1.98E-7        | 4.24E-7   | 9.08E-7   |               |  |  |
| HCT-15                      | 0.314     | 2.285 | 2.181                                 | 2.094 | 0.276 | 0.242 | 0.203 | 95   | 90   | -12  | -23  | -36  | 2.47E-7        | 7.59E-7   | > 1.00E-4 |               |  |  |
| HT29                        | 0.229     | 1.309 | 1.330                                 | 1.318 | 0.211 | 0.192 | 0.193 | 102  | 101  | -8   | -16  | -16  | 2.93E-7        | 8.43E-7   | > 1.00E-4 |               |  |  |
| KM12                        | 0.284     | 1.558 | 1.555                                 | 1.624 | 0.200 | 0.154 | 0.126 | 100  | 105  | -30  | -46  | -56  | 2.56E-7        | 6.02E-7   | 2.57E-5   |               |  |  |
| SW-620                      | 0.320     | 2.186 | 2.126                                 | 2.116 | 0.395 | 0.304 | 0.233 | 97   | 96   | 4    | -5   | -27  | 3.17E-7        | 2.79E-6   | > 1.00E-4 |               |  |  |
| CNS Cancer                  |           |       |                                       |       |       |       |       |      |      |      |      |      |                |           |           |               |  |  |
| SF-268                      | 0.667     | 1.855 | 1.844                                 | 1.826 | 0.958 | 0.744 | 0.710 | 99   | 98   | 24   | 6    | 4    | 4.47E-7        | > 1.00E-4 | > 1.00E-4 |               |  |  |
| SF-295                      | 0.886     | 3.186 | 2.981                                 | 3.036 | 1.178 | 0.862 | 0.785 | 91   | 93   | 13   | -3   | -11  | 3.45E-7        | 6.67E-6   | > 1.00E-4 |               |  |  |
| SF-539                      | 0.911     | 2.512 | 2.466                                 | 2.467 | 1.263 | 0.478 | 0.545 | 98   | 97   | 22   | -48  | -40  | 4.24E-7        | 2.07E-6   | > 1.00E-4 |               |  |  |
| SNB-19                      | 0.681     | 2.041 | 1.931                                 | 1.898 | 0.614 | 0.603 | 0.525 | 92   | 89   | 10   | -12  | -23  | 3.13E-7        | 2.88E-6   | > 1.00E-4 |               |  |  |
| SNB-75                      | 0.893     | 1.705 | 1.531                                 | 1.473 | 1.199 | 0.840 | 0.598 | 79   | 71   | 38   | -6   | -33  | 4.32E-7        | 7.29E-6   | > 1.00E-4 |               |  |  |
| U251                        | 0.482     | 2.040 | 1.974                                 | 1.818 | 0.173 | 0.166 | 0.180 | 96   | 86   | -64  | -66  | -63  | 1.73E-7        | 3.73E-7   | 8.05E-7   |               |  |  |
| Melanoma                    |           |       |                                       |       |       |       |       |      |      |      |      |      |                |           |           |               |  |  |
| LOX IMVI                    | 0.291     | 1.451 | 1.394                                 | 1.319 | 0.184 | 0.132 | 0.150 | 95   | 89   | -37  | -55  | -48  | 2.03E-7        | 5.08E-7   | .         |               |  |  |
| MALME-3M                    | 0.757     | 1.437 | 1.560                                 | 1.634 | 1.591 | 0.601 | 0.907 | 118  | 129  | 123  | -21  | 22   | 3.21E-6        | .         | > 1.00E-4 |               |  |  |
| M14                         | 0.505     | 1.919 | 1.953                                 | 1.982 | 1.818 | 0.744 | 0.942 | 102  | 104  | 93   | 17   | 31   | 3.66E-6        | > 1.00E-4 | > 1.00E-4 |               |  |  |
| MDA-MB-435                  | 0.532     | 2.382 | 2.193                                 | 2.154 | 1.453 | 0.274 | 0.482 | 90   | 88   | 50   | -48  | -9   | 9.85E-7        | 3.21E-6   | > 1.00E-4 |               |  |  |
| SK-MEL-2                    | 1.121     | 2.018 | 2.029                                 | 2.118 | 1.997 | 1.448 | 1.174 | 101  | 111  | 98   | 36   | 6    | 6.01E-6        | > 1.00E-4 | > 1.00E-4 |               |  |  |
| SK-MEL-28                   | 0.662     | 1.707 | 1.676                                 | 1.629 | 1.632 | 0.941 | 1.099 | 97   | 93   | 93   | 27   | 42   | 4.44E-6        | > 1.00E-4 | > 1.00E-4 |               |  |  |
| SK-MEL-5                    | 0.876     | 3.307 | 3.168                                 | 3.257 | 3.165 | 2.025 | 2.337 | 94   | 98   | 94   | 47   | 60   | .              | > 1.00E-4 | > 1.00E-4 |               |  |  |
| UACC-257                    | 0.834     | 1.637 | 1.588                                 | 1.560 | 1.523 | 1.053 | 1.169 | 94   | 90   | 86   | 27   | 42   | 4.08E-6        | > 1.00E-4 | > 1.00E-4 |               |  |  |
| UACC-62                     | 0.734     | 2.554 | 2.453                                 | 2.470 | 1.558 | 0.151 | 0.214 | 94   | 95   | 45   | -79  | -71  | 8.04E-7        | 2.31E-6   | 5.81E-6   |               |  |  |
| Ovarian Cancer              |           |       |                                       |       |       |       |       |      |      |      |      |      |                |           |           |               |  |  |
| IGROV1                      | 0.670     | 1.605 | 1.759                                 | 1.890 | 0.468 | 0.407 | 0.352 | 116  | 130  | -30  | -39  | -47  | 3.17E-7        | 6.49E-7   | > 1.00E-4 |               |  |  |
| OVCAR-3                     | 0.600     | 1.700 | 1.828                                 | 1.792 | 0.538 | 0.198 | 0.209 | 112  | 108  | -10  | -67  | -65  | 3.10E-7        | 8.18E-7   | 5.01E-6   |               |  |  |
| OVCAR-4                     | 0.621     | 1.024 | 1.032                                 | 0.951 | 0.663 | 0.652 | 0.680 | 102  | 82   | 10   | 8    | 15   | 2.79E-7        | > 1.00E-4 | > 1.00E-4 |               |  |  |
| OVCAR-5                     | 0.624     | 1.668 | 1.585                                 | 1.605 | 1.462 | 0.550 | 0.615 | 92   | 94   | 80   | -12  | -2   | 2.13E-6        | 7.43E-6   | > 1.00E-4 |               |  |  |
| OVCAR-8                     | 0.590     | 1.972 | 1.956                                 | 1.883 | 0.580 | 0.539 | 0.505 | 99   | 94   | -2   | -9   | -14  | 2.86E-7        | 9.58E-7   | > 1.00E-4 |               |  |  |
| NCI/ADR-RES                 | 0.815     | 2.576 | 2.656                                 | 2.736 | 1.775 | 1.199 | 1.187 | 105  | 109  | 54   | 22   | 21   | 1.37E-6        | > 1.00E-4 | > 1.00E-4 |               |  |  |
| SK-OV-3                     | 0.634     | 1.386 | 1.456                                 | 1.400 | 1.450 | 0.962 | 0.814 | 109  | 102  | 108  | 44   | 24   | 7.95E-6        | > 1.00E-4 | > 1.00E-4 |               |  |  |
| Renal Cancer                |           |       |                                       |       |       |       |       |      |      |      |      |      |                |           |           |               |  |  |
| 786-0                       | 0.833     | 2.589 | 2.609                                 | 2.660 | 0.521 | 0.073 | 0.057 | 101  | 104  | -37  | -91  | -93  | 2.41E-7        | 5.44E-7   | 1.71E-6   |               |  |  |
| A498                        | 1.722     | 2.227 | 2.062                                 | 2.032 | 1.966 | 1.261 | 1.585 | 67   | 61   | 48   | -27  | -8   | 7.27E-7        | 4.39E-6   | > 1.00E-4 |               |  |  |
| ACHN                        | 0.338     | 1.640 | 1.626                                 | 1.583 | 0.952 | 0.256 | 0.281 | 99   | 96   | 47   | -24  | -17  | 8.74E-7        | 4.56E-6   | > 1.00E-4 |               |  |  |
| CAKI-1                      | 1.171     | 3.069 | 2.862                                 | 2.917 | 2.626 | 0.888 | 1.043 | 89   | 92   | 77   | -24  | -11  | 1.84E-6        | 5.75E-6   | > 1.00E-4 |               |  |  |
| RXF 393                     | 0.960     | 1.882 | 1.676                                 | 1.738 | 1.454 | 0.138 | 0.116 | 78   | 84   | 54   | -86  | -88  | 1.06E-6        | 2.42E-6   | 5.54E-6   |               |  |  |
| SN12C                       | 0.730     | 2.680 | 2.549                                 | 2.519 | 0.618 | 0.455 | 0.407 | 93   | 92   | -15  | -38  | -44  | 2.45E-7        | 7.18E-7   | > 1.00E-4 |               |  |  |
| UO-31                       | 0.865     | 1.974 | 1.841                                 | 1.896 | 0.671 | 0.319 | 0.348 | 88   | 93   | -22  | -63  | -60  | 2.36E-7        | 6.39E-7   | 4.75E-6   |               |  |  |
| Prostate Cancer             |           |       |                                       |       |       |       |       |      |      |      |      |      |                |           |           |               |  |  |
| PC-3                        | 0.664     | 1.708 | 1.703                                 | 1.634 | 0.667 | 0.501 | 0.494 | 100  | 93   | .    | -25  | -26  | 2.91E-7        | 1.03E-6   | > 1.00E-4 |               |  |  |
| DU-145                      | 0.407     | 1.418 | 1.481                                 | 1.520 | 0.585 | 0.446 | 0.366 | 106  | 110  | 18   | 4    | -10  | 4.46E-7        | 1.88E-5   | > 1.00E-4 |               |  |  |
| Breast Cancer               |           |       |                                       |       |       |       |       |      |      |      |      |      |                |           |           |               |  |  |
| MCF7                        | 0.614     | 2.578 | 2.502                                 | 2.266 | 0.881 | 0.846 | 0.782 | 96   | 84   | 14   | 12   | 9    | 3.05E-7        | > 1.00E-4 | > 1.00E-4 |               |  |  |
| MDA-MB-231/ATCC             | 0.680     | 1.506 | 1.522                                 | 1.494 | 0.895 | 0.329 | 0.345 | 102  | 99   | 26   | -52  | -49  | 4.66E-7        | 2.16E-6   | .         |               |  |  |
| BT-549                      | 1.189     | 2.183 | 2.240                                 | 2.287 | 1.673 | 0.820 | 0.673 | 106  | 110  | 50   | -30  | -42  | 9.87E-7        | 4.21E-6   | > 1.00E-4 |               |  |  |
| T-47D                       | 0.598     | 1.662 | 1.647                                 | 1.616 | 1.182 | 0.676 | 0.710 | 99   | 96   | 55   | 7    | 11   | 1.27E-6        | > 1.00E-4 | > 1.00E-4 |               |  |  |
| MDA-MB-468                  | 1.003     | 2.440 | 2.302                                 | 2.349 | 1.795 | 0.620 | 0.659 | 90   | 94   | 55   | -38  | -34  | 1.13E-6        | 3.89E-6   | > 1.00E-4 |               |  |  |

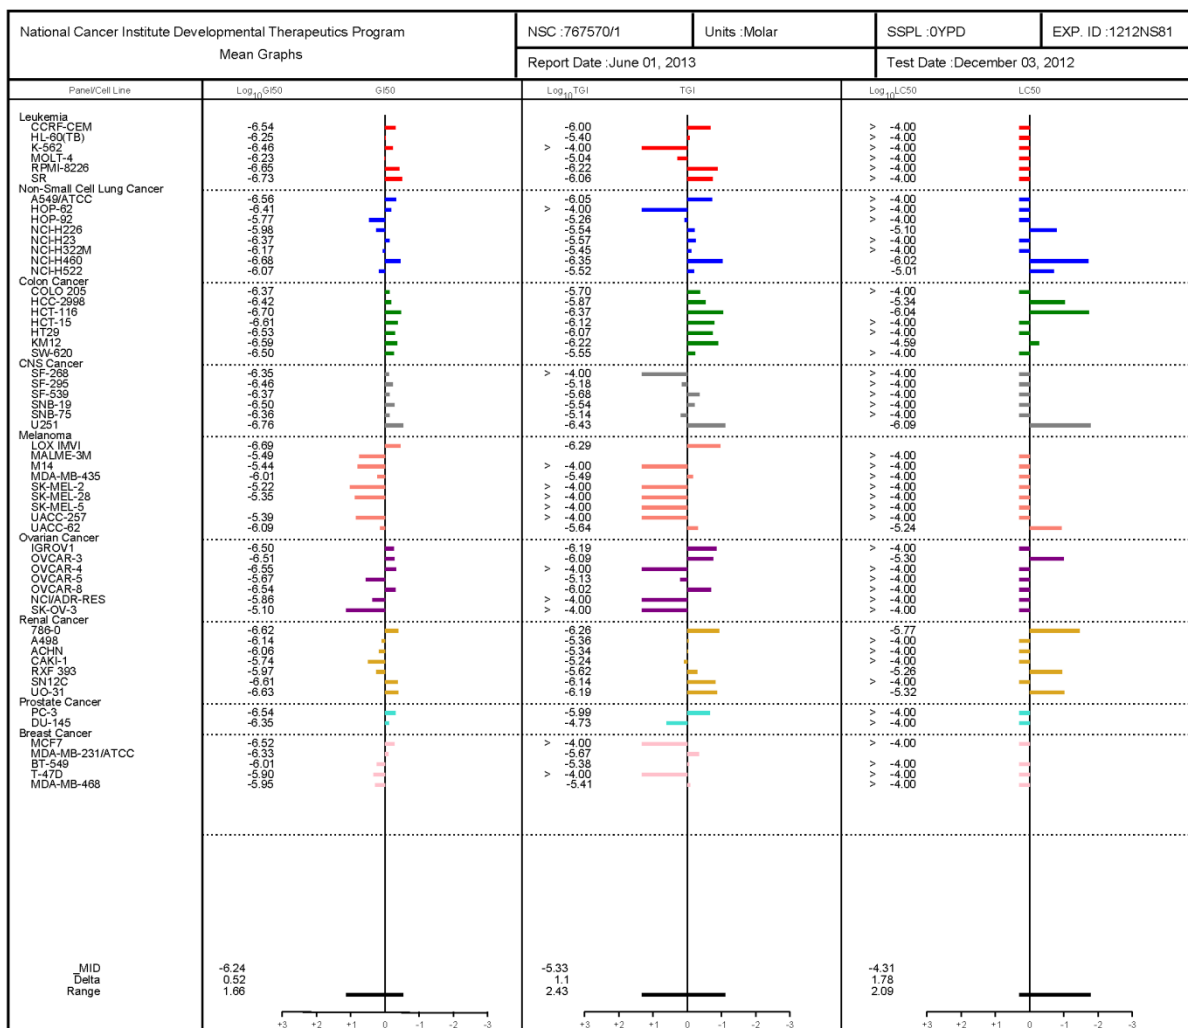

# One dose data of Compound 23

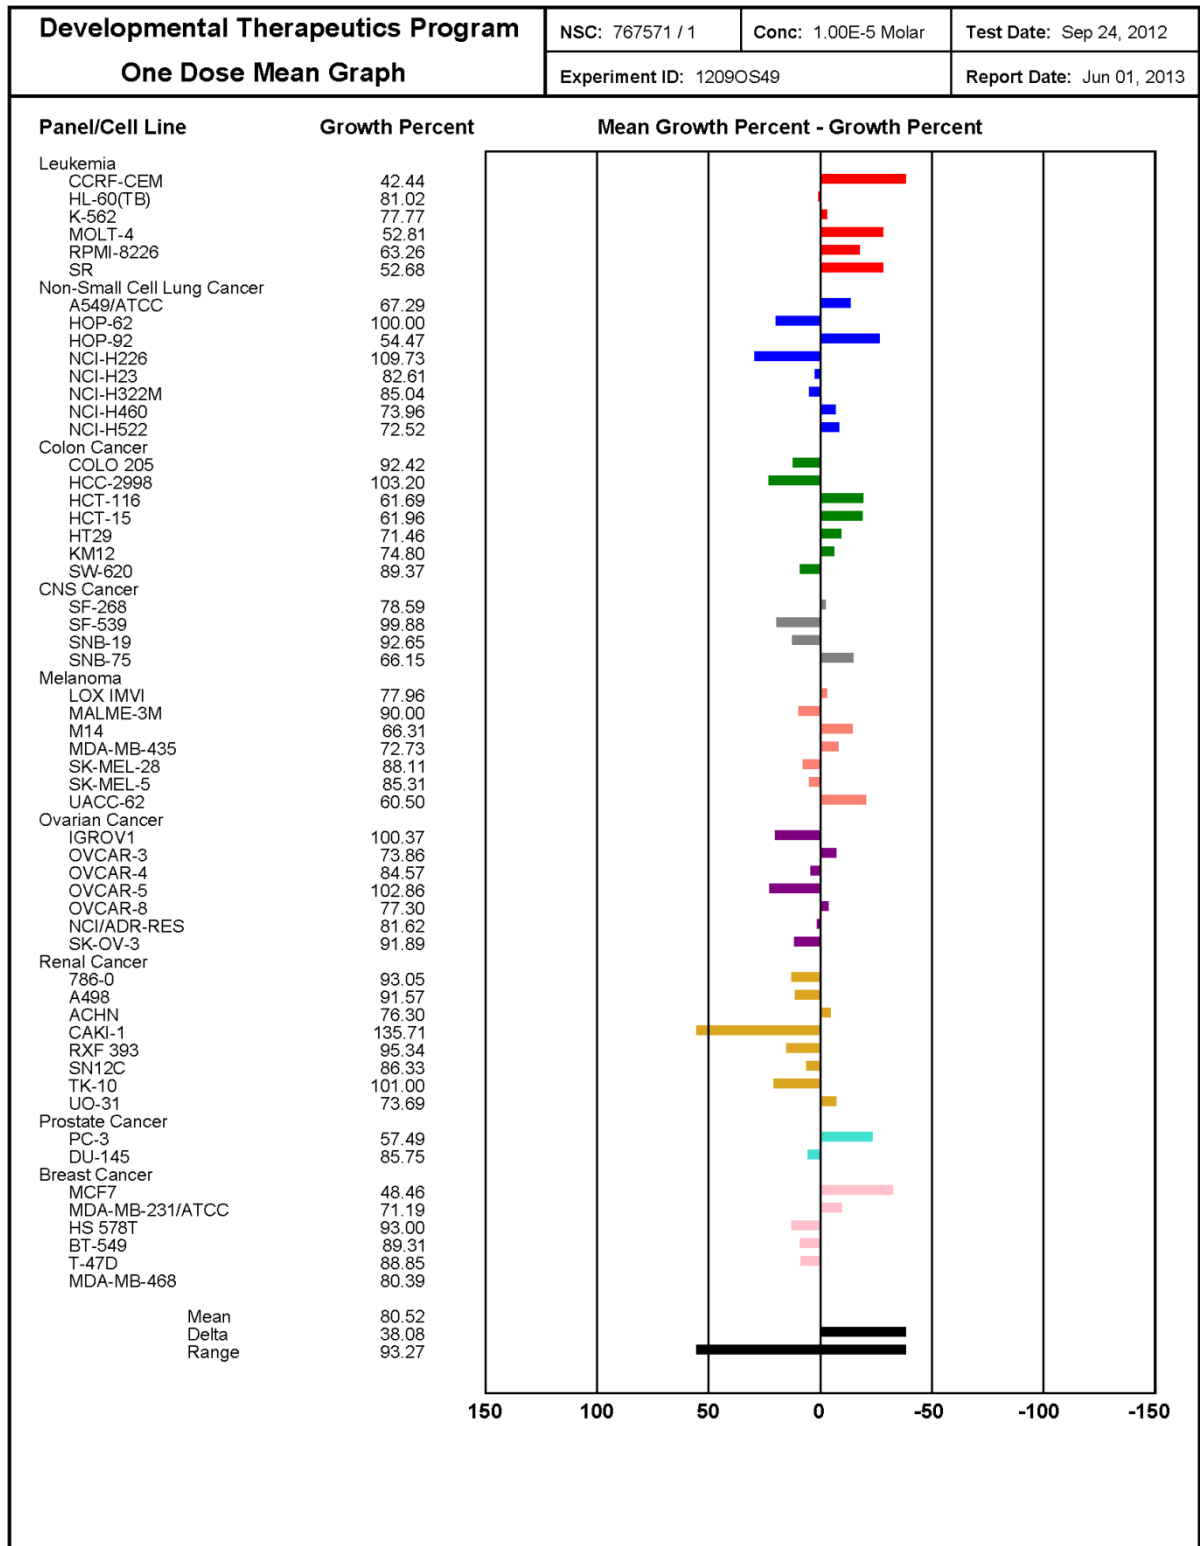

**NMR spectra (<sup>1</sup>H, <sup>13</sup>C) of compound (8-25)**

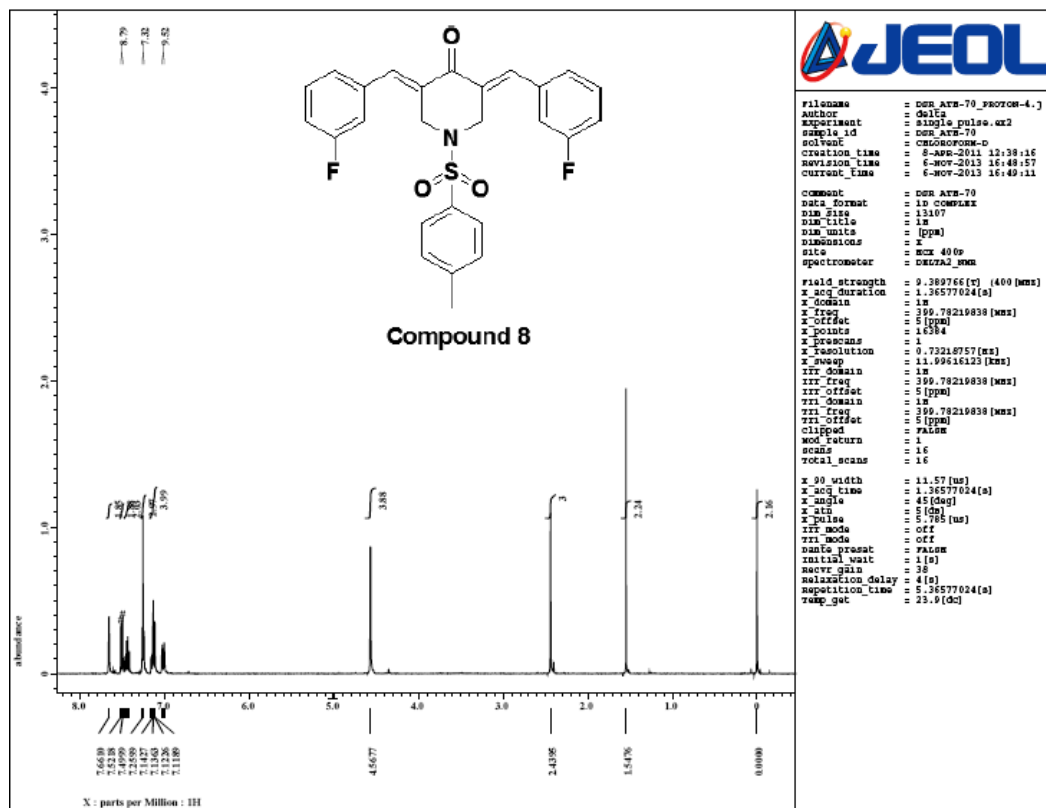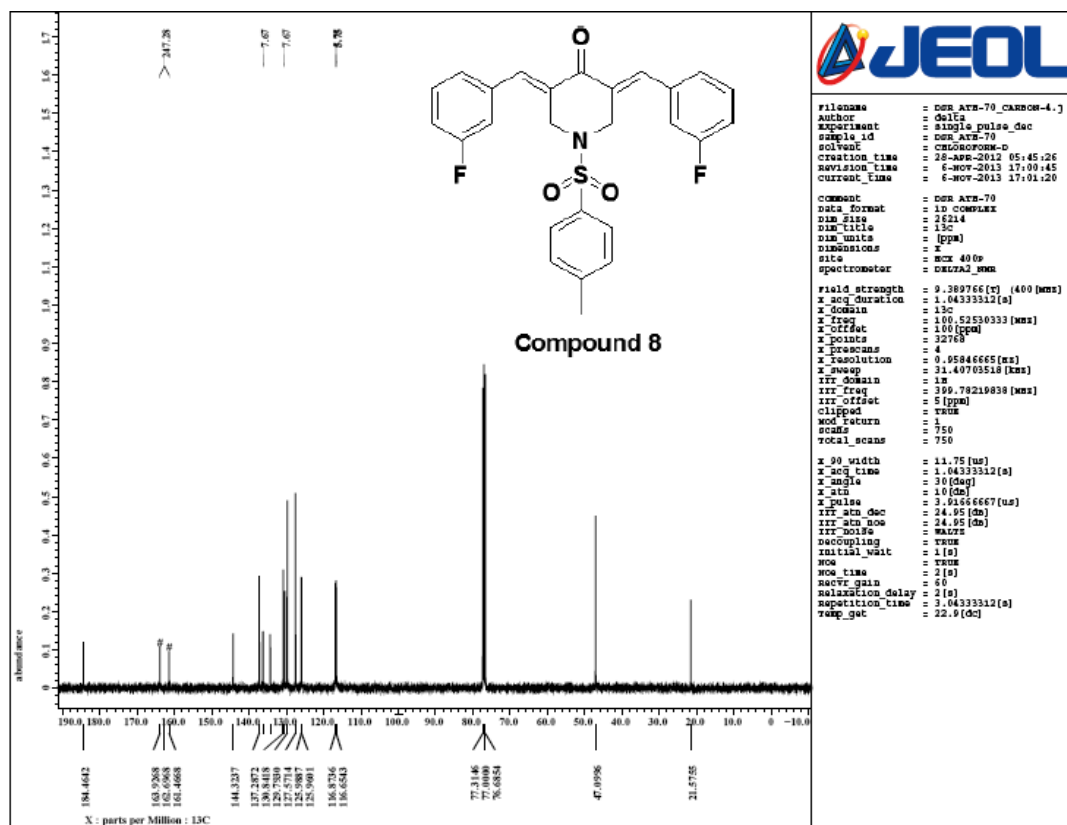

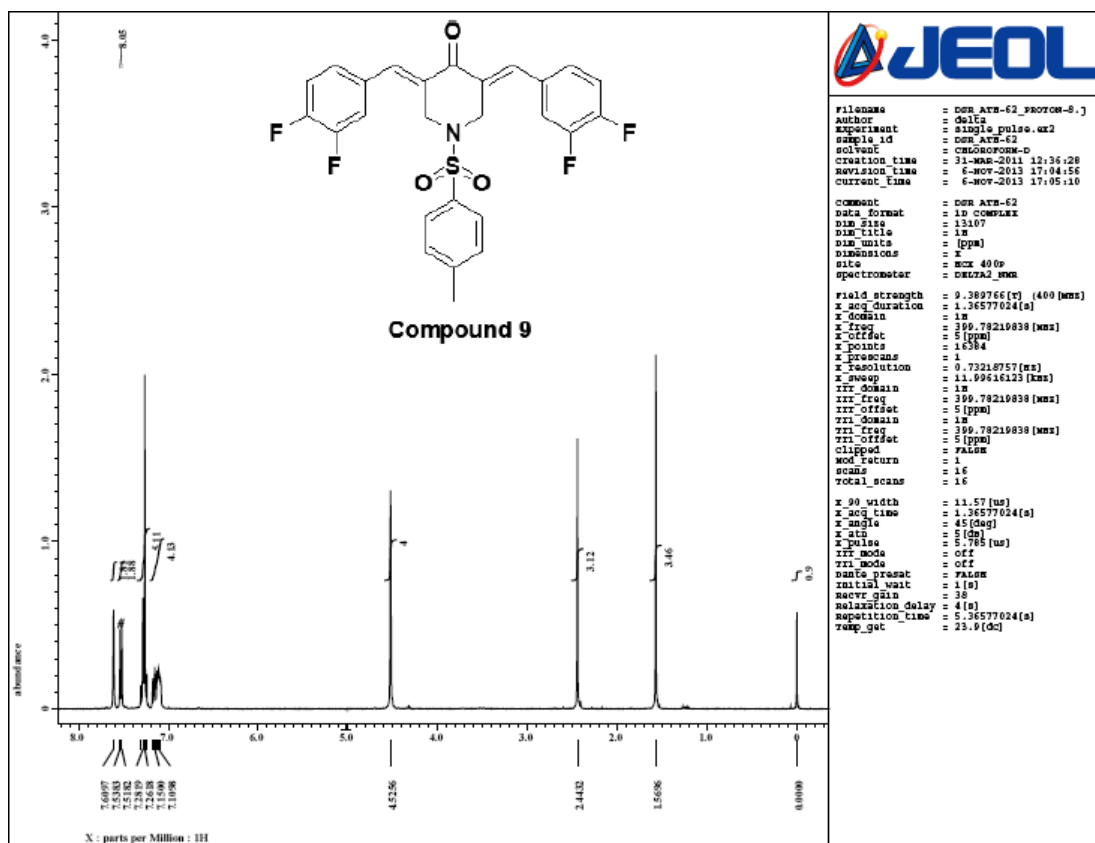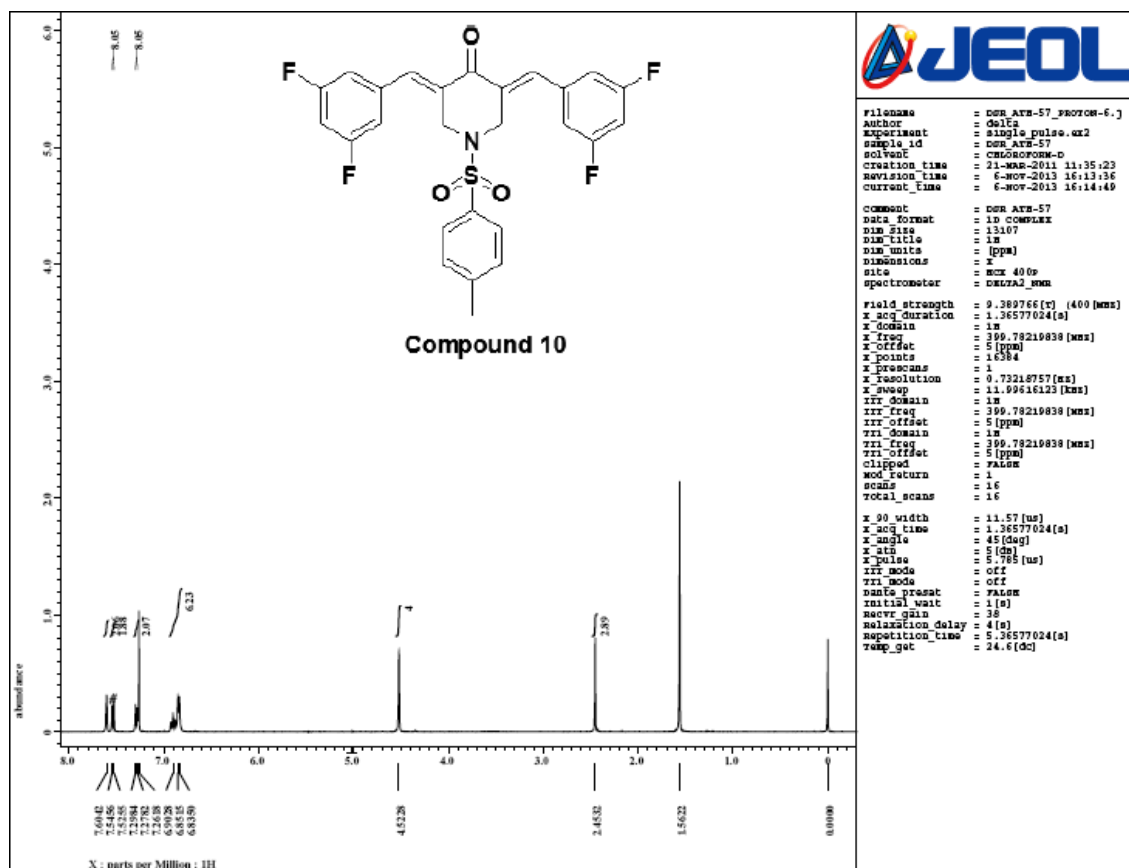





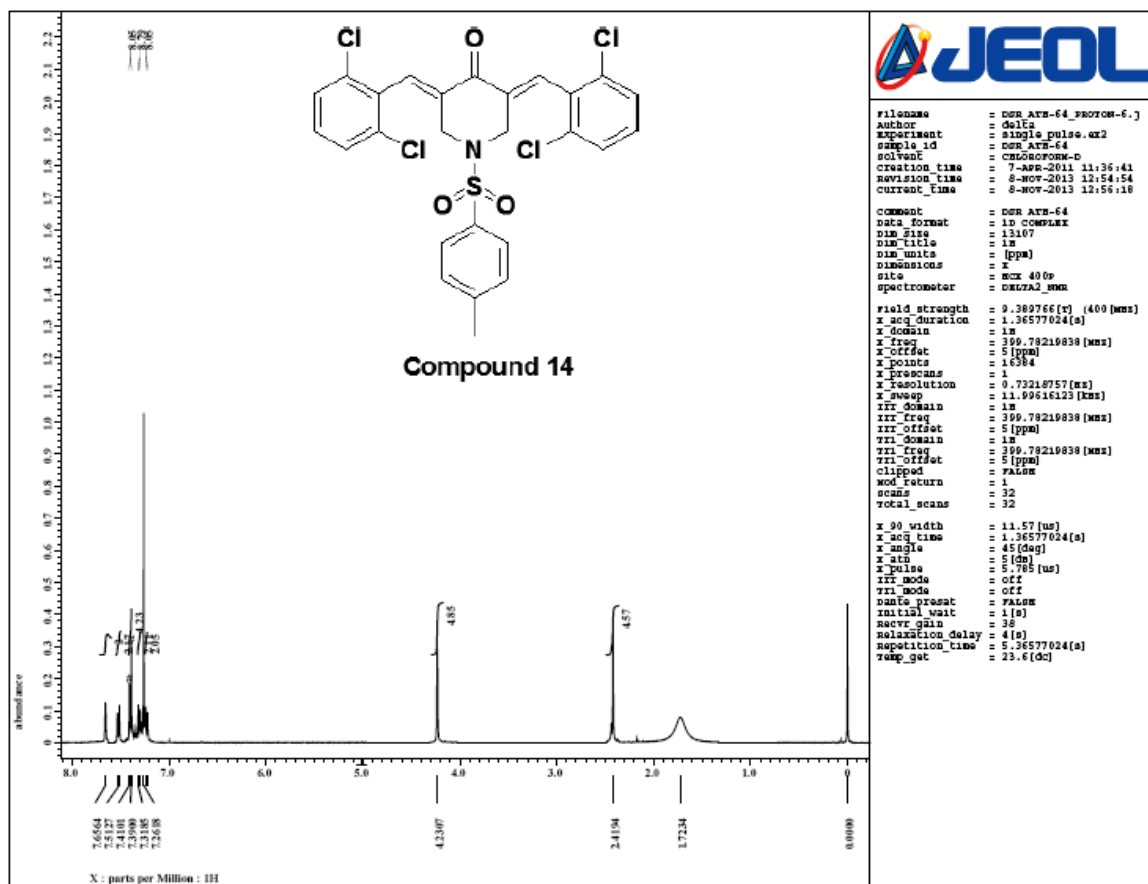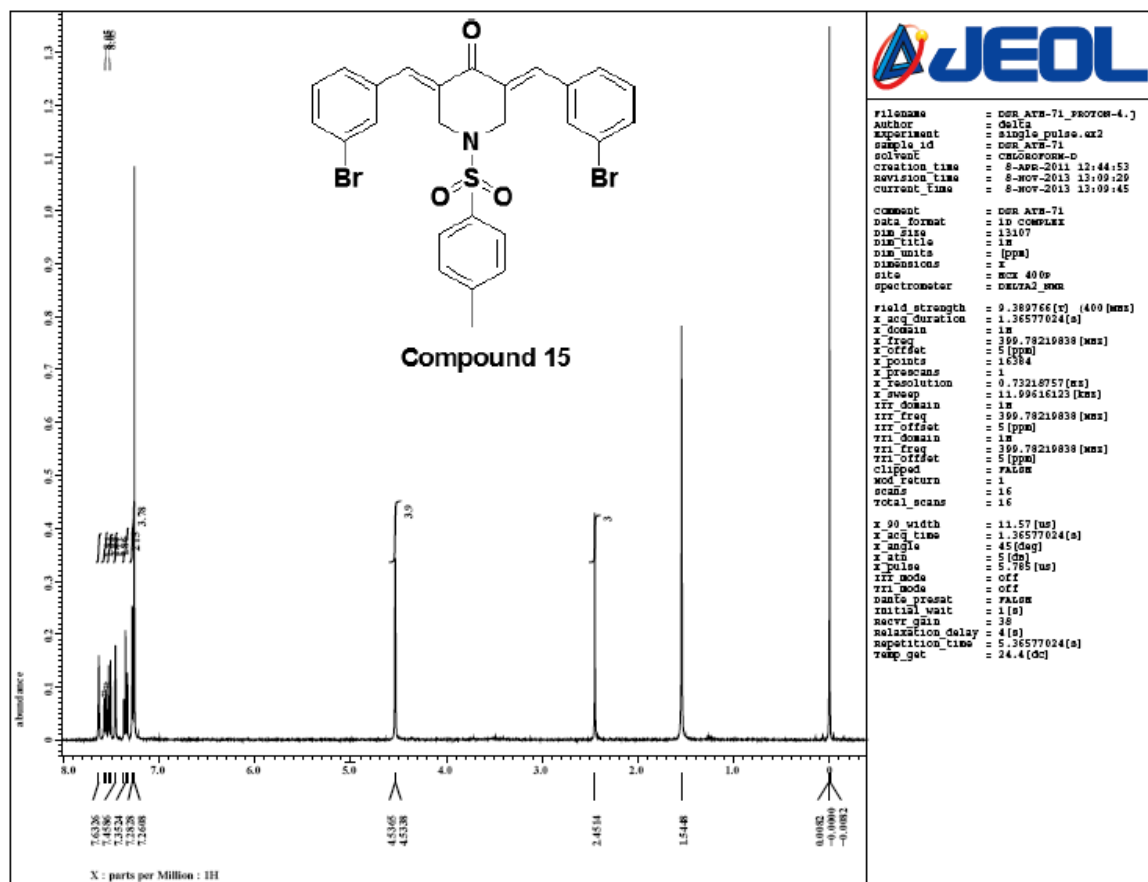



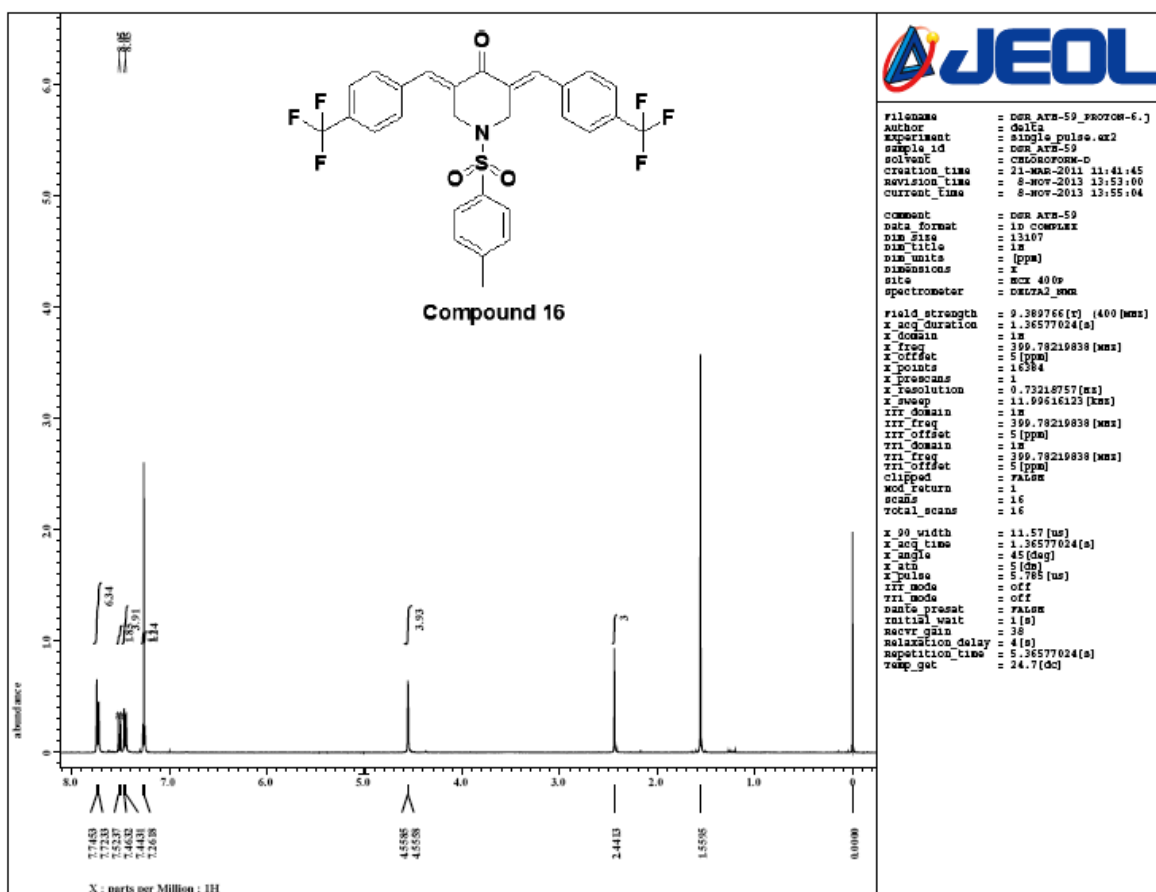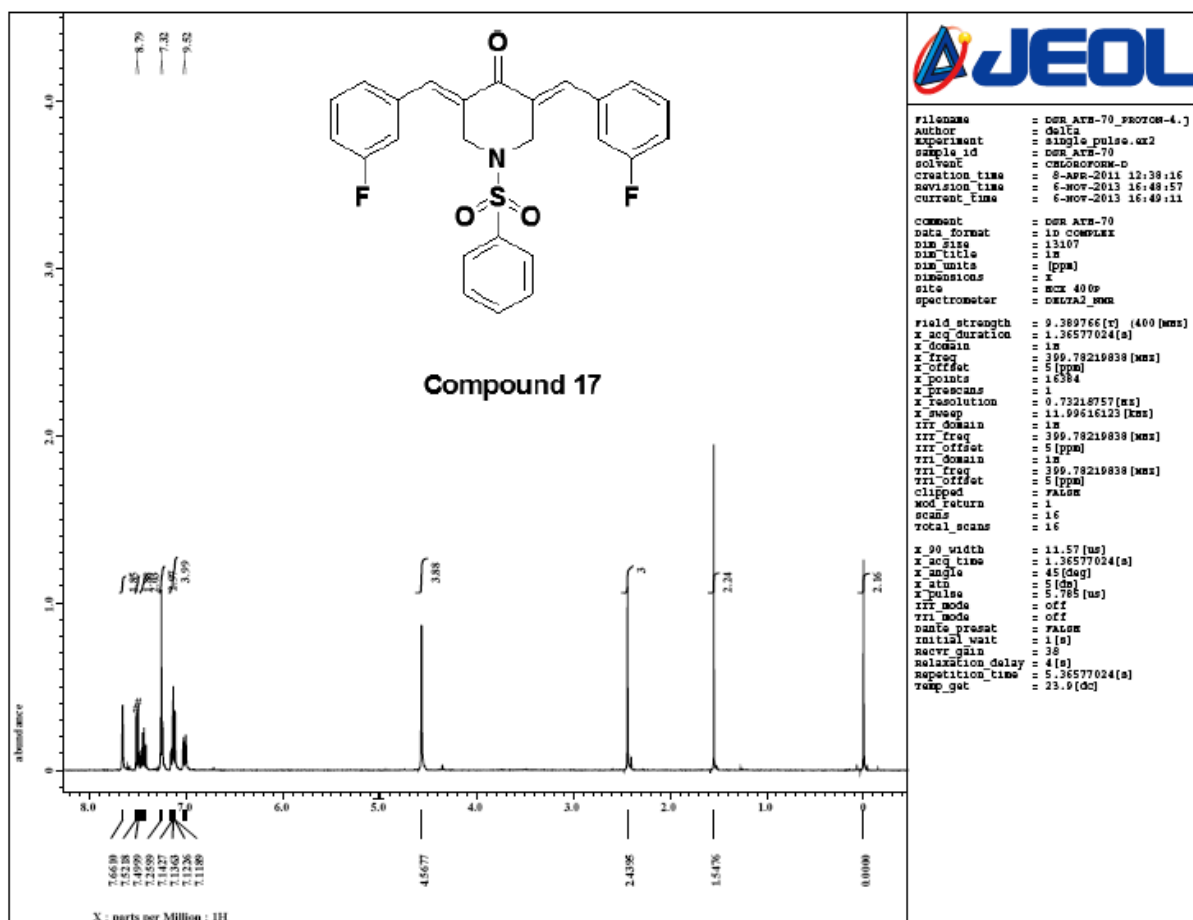

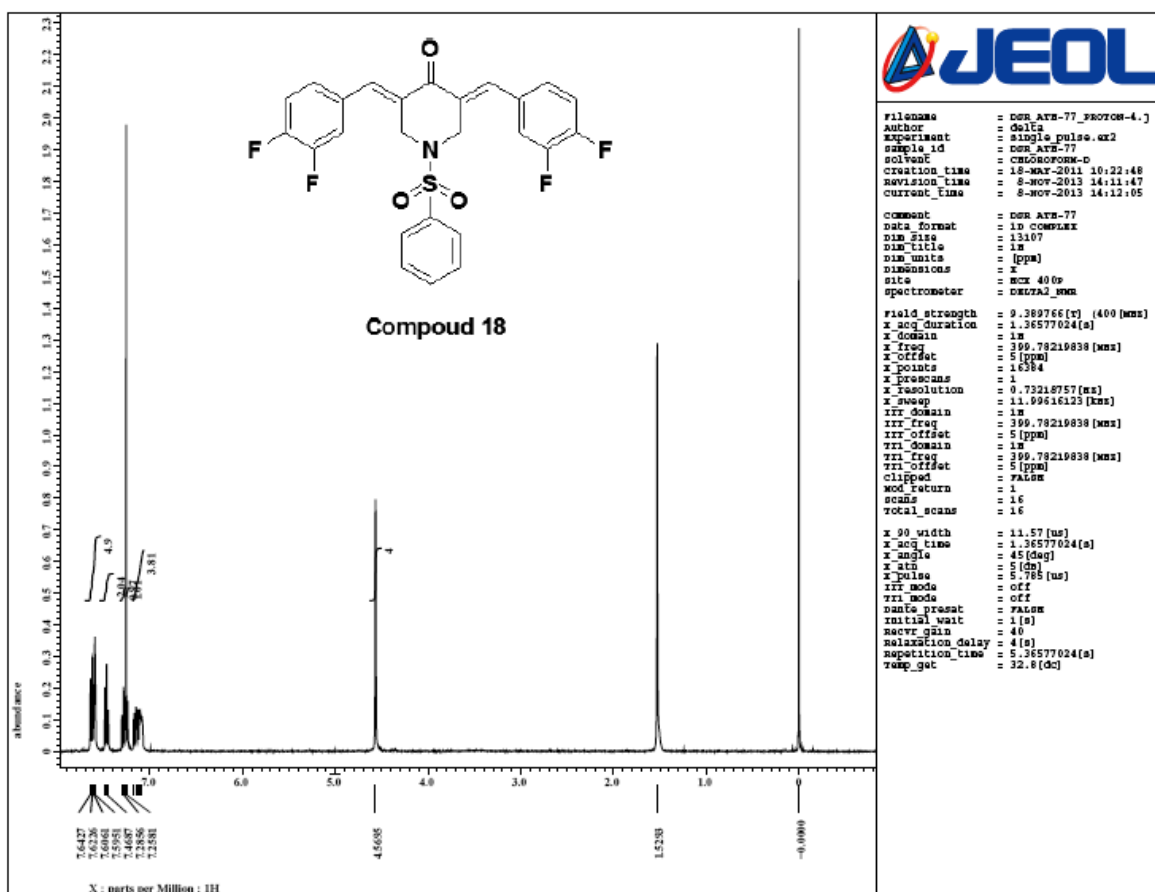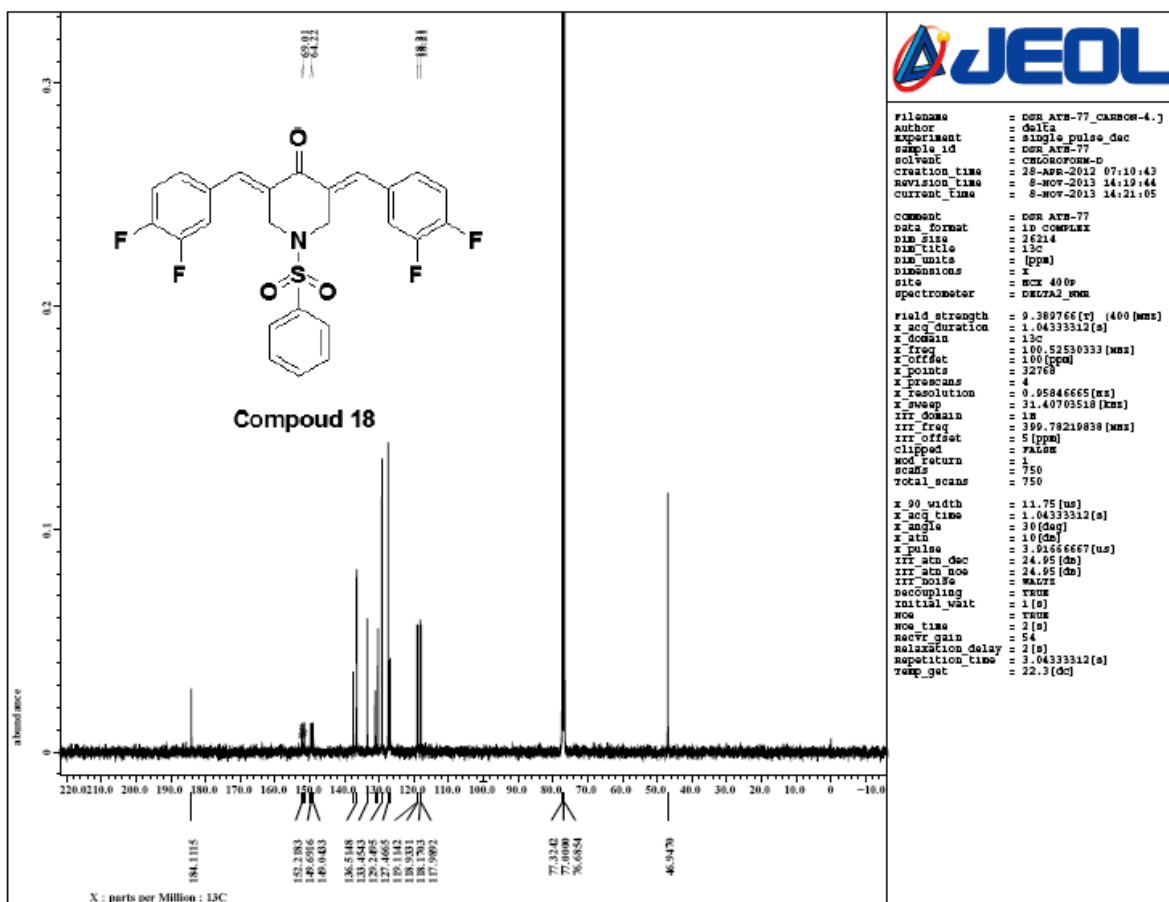



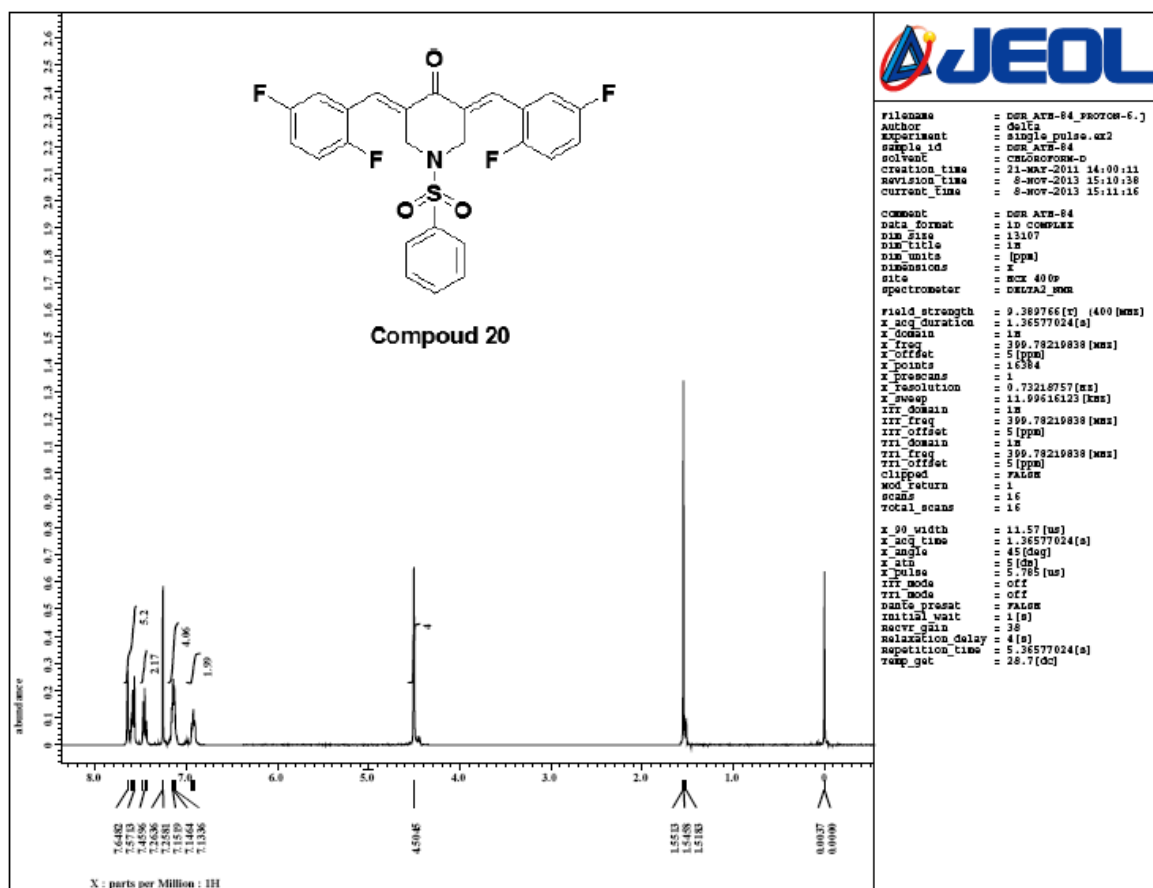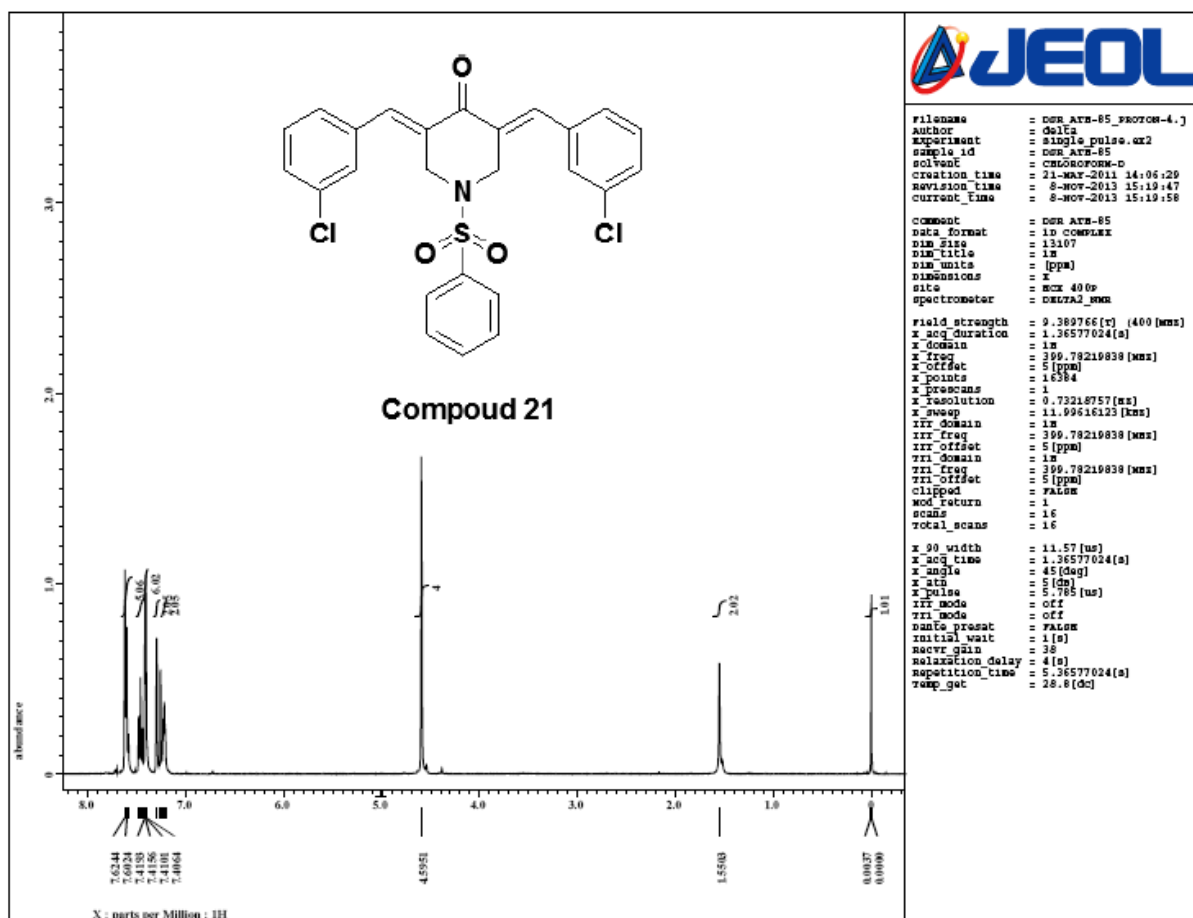





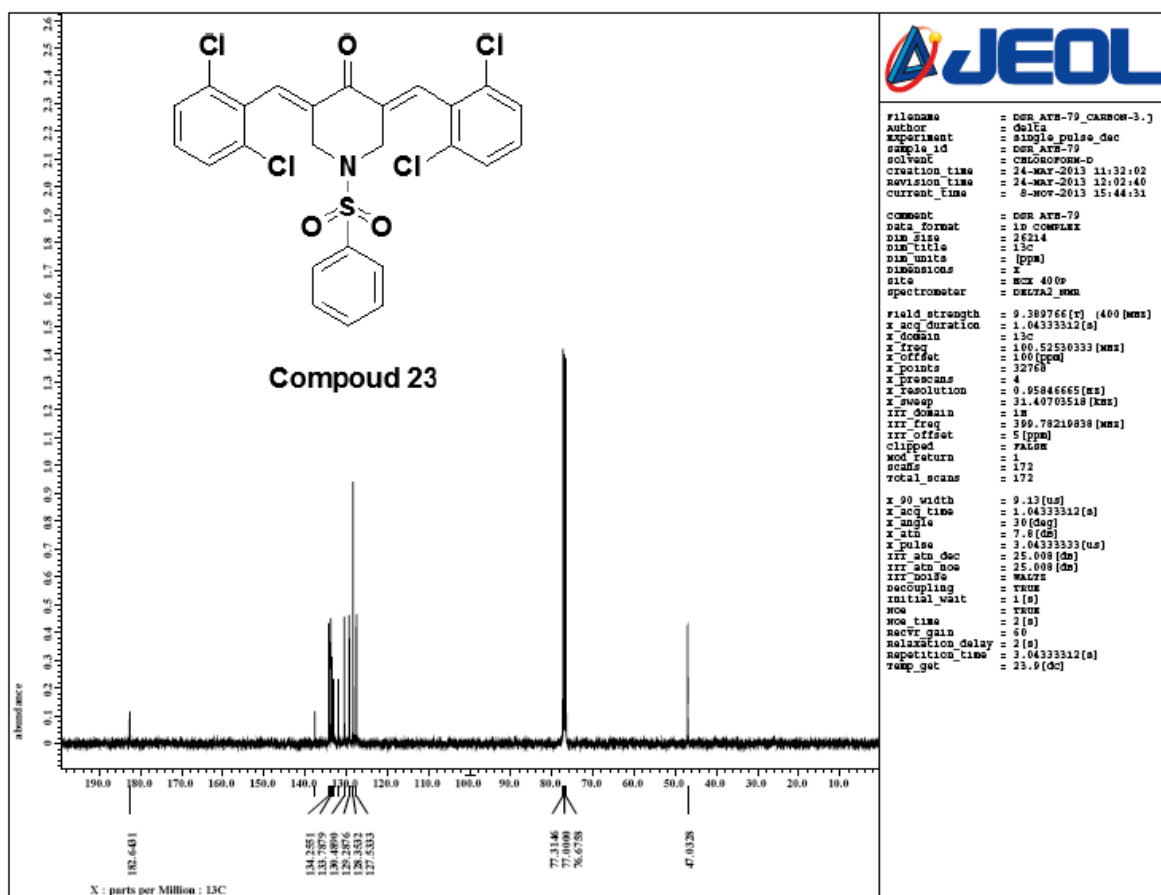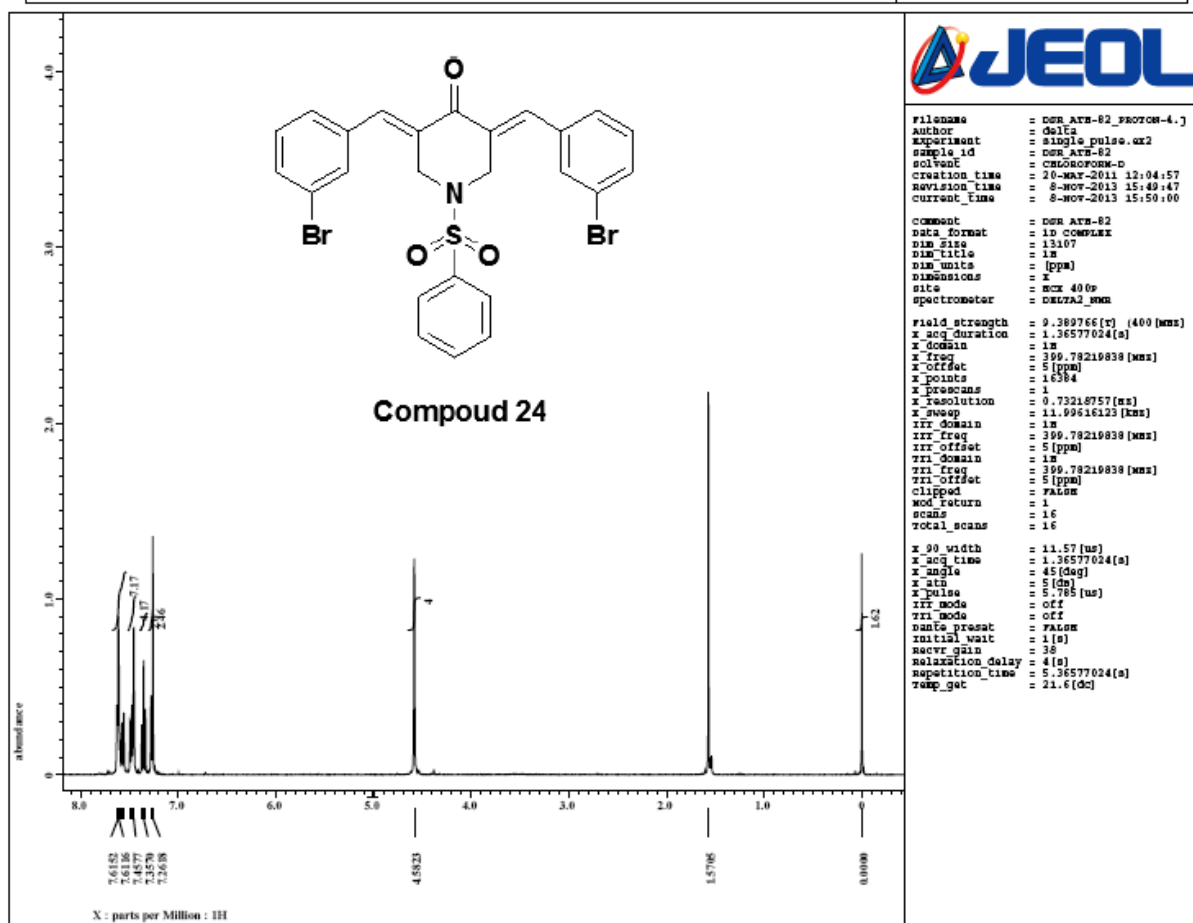





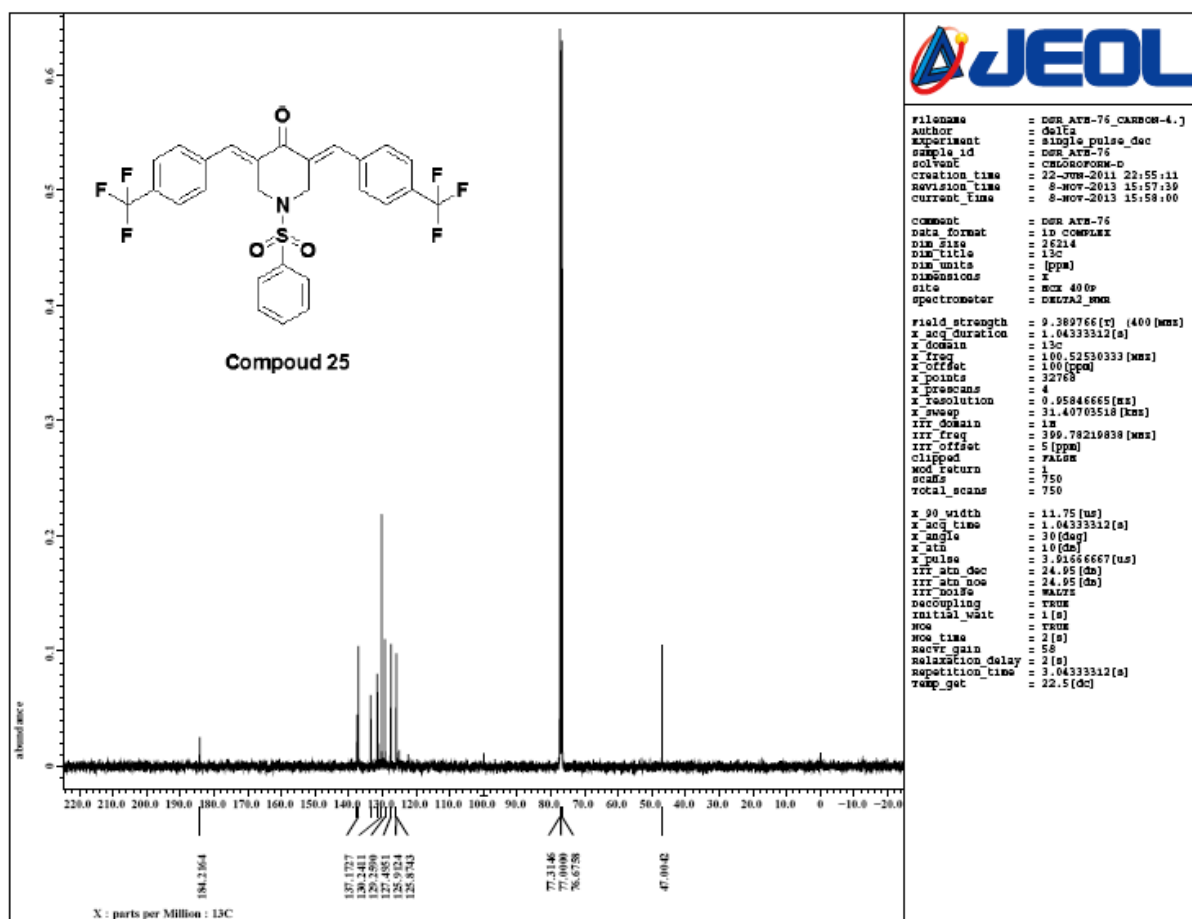

Supplement: c3md00399j1.pdf [file c3md00399j1.pdf]
